# Supplementary material for: Students Satisfaction with Online Higher Education during the COVID-19 Pandemic
Source: MDPI journal article supplement (doi:10.3390/educsci13040364), 2023-03-31

**One-sample Kolmogorov-Smirnov test**

|                                  |                | OLtexts                 | OLcorrespondence                                                         | OLvideo recording                |
|----------------------------------|----------------|-------------------------|--------------------------------------------------------------------------|----------------------------------|
|                                  |                | texts and presentations | correspondence between professors and students (e-mail, social networks) | video or audio recorded lectures |
| N                                |                | 808                     | 808                                                                      | 808                              |
| Normal parameters <sup>a,b</sup> | Mean           | 1,0978                  | 1,2958                                                                   | 1,3589                           |
|                                  | Std. Deviation | ,29719                  | ,45668                                                                   | ,47998                           |
|                                  | Module         | ,531                    | ,446                                                                     | ,414                             |
| Differences of extrema           | Positive       | ,531                    | ,446                                                                     | ,414                             |
|                                  | Negative       | -,371                   | -,259                                                                    | -,268                            |
| Test Statistic                   |                | ,531                    | ,446                                                                     | ,414                             |
| Asymp. Sig. (2-tailed)           |                | ,000 <sup>c</sup>       | ,000 <sup>c</sup>                                                        | ,000 <sup>c</sup>                |

**One-sample Kolmogorov-Smirnov test**

|                                  |                | OLvideo meetings                                                                | OLdopaudiovideo                                            | OLforms                                       |
|----------------------------------|----------------|---------------------------------------------------------------------------------|------------------------------------------------------------|-----------------------------------------------|
|                                  |                | video meetings between professors and students (Skype, Zoom, Google Meet, etc.) | additional audio and video materials (apart from lectures) | forums and other forms of student discussions |
| N                                |                | 808                                                                             | 808                                                        | 808                                           |
| Normal parameters <sup>a,b</sup> | Mean           | 1,1658                                                                          | 1,6423                                                     | 1,8094                                        |
|                                  | Std. Deviation | ,37217                                                                          | ,47961                                                     | ,39301                                        |
|                                  | Module         | ,506                                                                            | ,414                                                       | ,496                                          |
| Differences of extrema           | Positive       | ,506                                                                            | ,267                                                       | ,314                                          |
|                                  | Negative       | -,328                                                                           | -,414                                                      | -,496                                         |
| Test Statistic                   |                | ,506                                                                            | ,414                                                       | ,496                                          |
| Asymp. Sig. (2-tailed)           |                | ,000 <sup>c</sup>                                                               | ,000 <sup>c</sup>                                          | ,000 <sup>c</sup>                             |

**One-sample Kolmogorov-Smirnov test**

|                                  |                | OL projects                        | OLtutorials                           | OLtesting               |
|----------------------------------|----------------|------------------------------------|---------------------------------------|-------------------------|
|                                  |                | joint online projects for students | textbooks and manuals in digital form | automated testing tools |
| N                                |                | 808                                | 808                                   | 808                     |
| Normal parameters <sup>a,b</sup> | Mean           | 1,7277                             | 1,5173                                | 1,6176                  |
|                                  | Std. Deviation | ,44541                             | ,50001                                | ,48628                  |

|                        |          |                   |                   |                   |
|------------------------|----------|-------------------|-------------------|-------------------|
|                        | Module   | ,457              | ,350              | ,402              |
| Differences of extrema | Positive | ,271              | ,332              | ,280              |
|                        | Negative | -,457             | -,350             | -,402             |
| Test Statistic         |          | ,457              | ,350              | ,402              |
| Asymp. Sig. (2-tailed) |          | ,000 <sup>c</sup> | ,000 <sup>c</sup> | ,000 <sup>c</sup> |

#### One-sample Kolmogorov-Smirnov test

|                                  | OLapplications                    | SATISFACTION                                                                      | TPA1                                                                  |
|----------------------------------|-----------------------------------|-----------------------------------------------------------------------------------|-----------------------------------------------------------------------|
|                                  | software applications for various | Evaluate your overall satisfaction with online education at the time of Covid 19. | Teachers clearly indicate the learning objectives in online teaching. |
| N                                | 808                               | 808                                                                               | 808                                                                   |
| Normal parameters <sup>a,b</sup> | Mean                              | 1,8626                                                                            | 3,3119                                                                |
|                                  | Std. Deviation                    | ,34446                                                                            | 1,24626                                                               |
|                                  | Module                            | ,518                                                                              | ,193                                                                  |
| Differences of extrema           | Positive                          | ,345                                                                              | ,115                                                                  |
|                                  | Negative                          | -,518                                                                             | -,193                                                                 |
| Test Statistic                   | ,518                              | ,193                                                                              | ,213                                                                  |
| Asymp. Sig. (2-tailed)           | ,000 <sup>c</sup>                 | ,000 <sup>c</sup>                                                                 | ,000 <sup>c</sup>                                                     |

#### One-sample Kolmogorov-Smirnov test

|                                  | TPA2                                                                           | TPA3                                                                 | TPA4                                                    | TPA5                                     |
|----------------------------------|--------------------------------------------------------------------------------|----------------------------------------------------------------------|---------------------------------------------------------|------------------------------------------|
|                                  | Teachers clearly point out important deadlines and students' responsibilities. | Teachers encourage and lead students' discussions in online classes. | Teachers direct students to learn by doing assignments. | Teachers encourage students to research. |
| N                                | 808                                                                            | 808                                                                  | 808                                                     | 808                                      |
| Normal parameters <sup>a,b</sup> | Mean                                                                           | 4,0978                                                               | 3,6535                                                  | 3,7537                                   |
|                                  | Std. Deviation                                                                 | 1,04619                                                              | 1,21074                                                 | 1,11983                                  |
|                                  | Module                                                                         | ,259                                                                 | ,197                                                    | ,227                                     |
| Differences of extrema           | Positive                                                                       | ,194                                                                 | ,133                                                    | ,133                                     |
|                                  | Negative                                                                       | -,259                                                                | -,197                                                   | -,227                                    |
| Test Statistic                   | ,259                                                                           | ,197                                                                 | ,227                                                    | ,198                                     |
| Asymp. Sig. (2-tailed)           | ,000 <sup>c</sup>                                                              | ,000 <sup>c</sup>                                                    | ,000 <sup>c</sup>                                       | ,000 <sup>c</sup>                        |

#### One-sample Kolmogorov-Smirnov test

|  | TPA6 | TPA | SPA1 | SPA2 |
|--|------|-----|------|------|
|--|------|-----|------|------|

|                                  |                |                                                                |                           |                                                                                  |                                                         |
|----------------------------------|----------------|----------------------------------------------------------------|---------------------------|----------------------------------------------------------------------------------|---------------------------------------------------------|
|                                  |                | Teachers send students feedback on their progress in learning. | teaching presence average | Tools and platforms for online learning enable students to work with each other. | Students work in pairs or groups on online assignments. |
| N                                |                | 808                                                            | 808                       | 808                                                                              | 808                                                     |
| Normal parameters <sup>a,b</sup> | Mean           | 3,3255                                                         | 3,7032                    | 3,6151                                                                           | 3,3540                                                  |
|                                  | Std. Deviation | 1,31118                                                        | ,95771                    | 1,26005                                                                          | 1,39869                                                 |
|                                  | Module         | ,190                                                           | ,088                      | ,193                                                                             | ,198                                                    |
| Differences of extrema           | Positive       | ,122                                                           | ,088                      | ,136                                                                             | ,131                                                    |
|                                  | Negative       | -,190                                                          | -,082                     | -,193                                                                            | -,198                                                   |
| Test Statistic                   |                | ,190                                                           | ,088                      | ,193                                                                             | ,198                                                    |
| Asymp. Sig. (2-tailed)           |                | ,000 <sup>c</sup>                                              | ,000 <sup>c</sup>         | ,000 <sup>c</sup>                                                                | ,000 <sup>c</sup>                                       |

#### One-sample Kolmogorov-Smirnov test

|                                  |                | SPA3                                                                             | SPA4                                                                           | SPA5                                                                                 | SPA6                                                                                            |
|----------------------------------|----------------|----------------------------------------------------------------------------------|--------------------------------------------------------------------------------|--------------------------------------------------------------------------------------|-------------------------------------------------------------------------------------------------|
|                                  |                | Expressing the opposite opinion from others in online discussions is acceptable. | Joint activities with other students help me to test and improve my knowledge. | Online collaboration with other students provides a sense of belonging to the group. | Interaction with other students regarding the learning content provides new insights and ideas. |
| N                                |                | 808                                                                              | 808                                                                            | 808                                                                                  | 808                                                                                             |
| Normal parameters <sup>a,b</sup> | Mean           | 3,9134                                                                           | 3,7488                                                                         | 3,4715                                                                               | 3,7970                                                                                          |
|                                  | Std. Deviation | 1,06768                                                                          | 1,18959                                                                        | 1,29691                                                                              | 1,15937                                                                                         |
|                                  | Module         | ,216                                                                             | ,220                                                                           | ,182                                                                                 | ,228                                                                                            |
| Differences of extrema           | Positive       | ,154                                                                             | ,146                                                                           | ,119                                                                                 | ,150                                                                                            |
|                                  | Negative       | -,216                                                                            | -,220                                                                          | -,182                                                                                | -,228                                                                                           |
| Test Statistic                   |                | ,216                                                                             | ,220                                                                           | ,182                                                                                 | ,228                                                                                            |
| Asymp. Sig. (2-tailed)           |                | ,000 <sup>c</sup>                                                                | ,000 <sup>c</sup>                                                              | ,000 <sup>c</sup>                                                                    | ,000 <sup>c</sup>                                                                               |

#### One-sample Kolmogorov-Smirnov test

|                                  |                | SPA                     | CPA1                                                                        | CPA2                                                                             | CPA3                                                                              |
|----------------------------------|----------------|-------------------------|-----------------------------------------------------------------------------|----------------------------------------------------------------------------------|-----------------------------------------------------------------------------------|
|                                  |                | social presence average | Topics and contents of online classes stimulate my interest and creativity. | Online teaching tools provide access to the necessary information and knowledge. | Participating in online discussions helps me appreciate different points of view. |
| N                                |                | 808                     | 808                                                                         | 808                                                                              | 808                                                                               |
| Normal parameters <sup>a,b</sup> | Mean           | 3,6753                  | 3,2636                                                                      | 3,7698                                                                           | 3,5186                                                                            |
|                                  | Std. Deviation | ,93250                  | 1,24200                                                                     | 1,05909                                                                          | 1,16630                                                                           |

|                        |          |                   |                   |                   |                   |
|------------------------|----------|-------------------|-------------------|-------------------|-------------------|
|                        | Module   | ,078              | ,176              | ,216              | ,190              |
| Differences of extrema | Positive | ,078              | ,131              | ,136              | ,142              |
|                        | Negative | -,068             | -,176             | -,216             | -,190             |
| Test Statistic         |          | ,078              | ,176              | ,216              | ,190              |
| Asymp. Sig. (2-tailed) |          | ,000 <sup>c</sup> | ,000 <sup>c</sup> | ,000 <sup>c</sup> | ,000 <sup>c</sup> |

#### One-sample Kolmogorov-Smirnov test

|                                  |                | CPA4                                                                                | CPA5                                                                       | CPA6                                                                         | CPA                        |
|----------------------------------|----------------|-------------------------------------------------------------------------------------|----------------------------------------------------------------------------|------------------------------------------------------------------------------|----------------------------|
|                                  |                | By combining old and new information, I clarify the issues raised in the classroom. | Engaging in online teaching helps me to resolve doubts about the material. | The techniques and methods of work in online classes suit my learning style. | cognitive presence average |
| N                                |                | 808                                                                                 | 808                                                                        | 808                                                                          | 808                        |
| Normal parameters <sup>a,b</sup> | Mean           | 3,6522                                                                              | 3,4666                                                                     | 3,2215                                                                       | 3,4820                     |
|                                  | Std. Deviation | 1,10383                                                                             | 1,19328                                                                    | 1,37573                                                                      | ,98317                     |
|                                  | Module         | ,209                                                                                | ,201                                                                       | ,166                                                                         | ,061                       |
| Differences of extrema           | Positive       | ,137                                                                                | ,124                                                                       | ,120                                                                         | ,061                       |
|                                  | Negative       | -,209                                                                               | -,201                                                                      | -,166                                                                        | -,061                      |
| Test Statistic                   |                | ,209                                                                                | ,201                                                                       | ,166                                                                         | ,061                       |
| Asymp. Sig. (2-tailed)           |                | ,000 <sup>c</sup>                                                                   | ,000 <sup>c</sup>                                                          | ,000 <sup>c</sup>                                                            | ,000 <sup>c</sup>          |

#### One-sample Kolmogorov-Smirnov test

|                                  |                | Col               |
|----------------------------------|----------------|-------------------|
| N                                |                | 808               |
| Normal parameters <sup>a,b</sup> | Mean           | 3,6201            |
|                                  | Std. Deviation | ,86010            |
|                                  | Module         | ,054              |
| Differences of extrema           | Positive       | ,054              |
|                                  | Negative       | -,045             |
| Test Statistic                   |                | ,054              |
| Asymp. Sig. (2-tailed)           |                | ,000 <sup>c</sup> |

a. Comparison with the normal distribution.

b. Estimated from the data..

c. Lilliefors Significance Correction

#### Descriptive statistics

|         | N          | Asymmetry  |            | Kurtosis   |            |
|---------|------------|------------|------------|------------|------------|
|         | Statistics | Statistics | Std. error | Statistics | Std. error |
| OLtexts | 808        | 2,714      | ,086       | 5,377      | ,172       |

|                   |     |        |      |        |      |
|-------------------|-----|--------|------|--------|------|
| OLcorrespondence  | 808 | ,897   | ,086 | -1,199 | ,172 |
| OLvideo recording | 808 | ,589   | ,086 | -1,657 | ,172 |
| OLvideo meetings  | 808 | 1,800  | ,086 | 1,244  | ,172 |
| OLdopaudiovideo   | 808 | -,595  | ,086 | -1,650 | ,172 |
| OLforms           | 808 | -1,578 | ,086 | ,493   | ,172 |
| OL projects       | 808 | -1,025 | ,086 | -,952  | ,172 |
| OLtutorials       | 808 | -,069  | ,086 | -2,000 | ,172 |
| OLtesting         | 808 | -,485  | ,086 | -1,769 | ,172 |
| OLapplications    | 808 | -2,111 | ,086 | 2,461  | ,172 |
| SATISFACTION      | 808 | -,337  | ,086 | -,850  | ,172 |
| TPA1              | 808 | -,641  | ,086 | -,338  | ,172 |
| TPA2              | 808 | -1,127 | ,086 | ,676   | ,172 |
| TPA3              | 808 | -,584  | ,086 | -,576  | ,172 |
| TPA4              | 808 | -,698  | ,086 | -,232  | ,172 |
| TPA5              | 808 | -,585  | ,086 | -,698  | ,172 |
| TPA6              | 808 | -,323  | ,086 | -1,009 | ,172 |
| TPA               | 808 | -,529  | ,086 | -,325  | ,172 |
| SPA1              | 808 | -,550  | ,086 | -,737  | ,172 |
| SPA2              | 808 | -,359  | ,086 | -1,159 | ,172 |
| SPA3              | 808 | -,758  | ,086 | -,126  | ,172 |
| SPA4              | 808 | -,732  | ,086 | -,340  | ,172 |
| SPA5              | 808 | -,450  | ,086 | -,845  | ,172 |
| SPA6              | 808 | -,823  | ,086 | -,069  | ,172 |
| SPA               | 808 | -,464  | ,086 | -,305  | ,172 |
| CPA1              | 808 | -,280  | ,086 | -,847  | ,172 |
| CPA2              | 808 | -,635  | ,086 | -,150  | ,172 |
| CPA3              | 808 | -,440  | ,086 | -,581  | ,172 |
| CPA4              | 808 | -,572  | ,086 | -,278  | ,172 |
| CPA5              | 808 | -,438  | ,086 | -,659  | ,172 |
| CPA6              | 808 | -,226  | ,086 | -1,146 | ,172 |
| CPA               | 808 | -,297  | ,086 | -,441  | ,172 |
| Col               | 808 | -,292  | ,086 | -,381  | ,172 |
| N valid (whole)   | 808 |        |      |        |      |

QQ Graphics

**OLtexts**

Нормальное, вероятностный график (квантили) для ЭОтексты

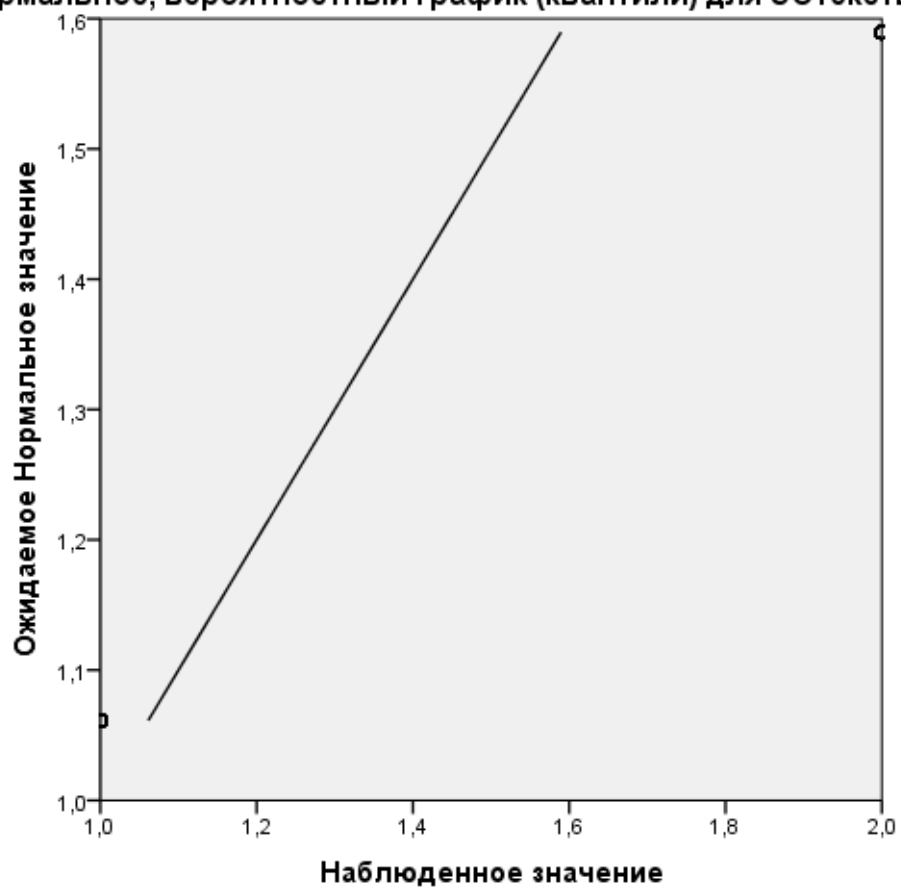

Нормальное, вероятностный график остатков (квантили) с удаленным трендом для ЭОтексты

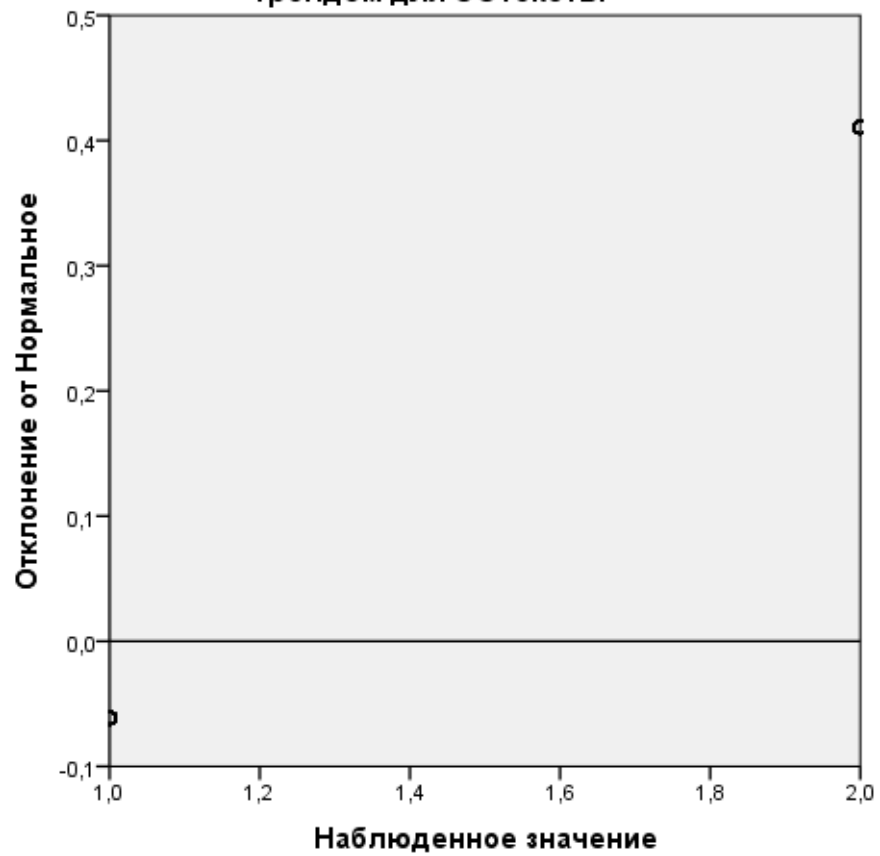

OLcorrespondence

Нормальное, вероятностный график (квантили) для ЭОпереписка

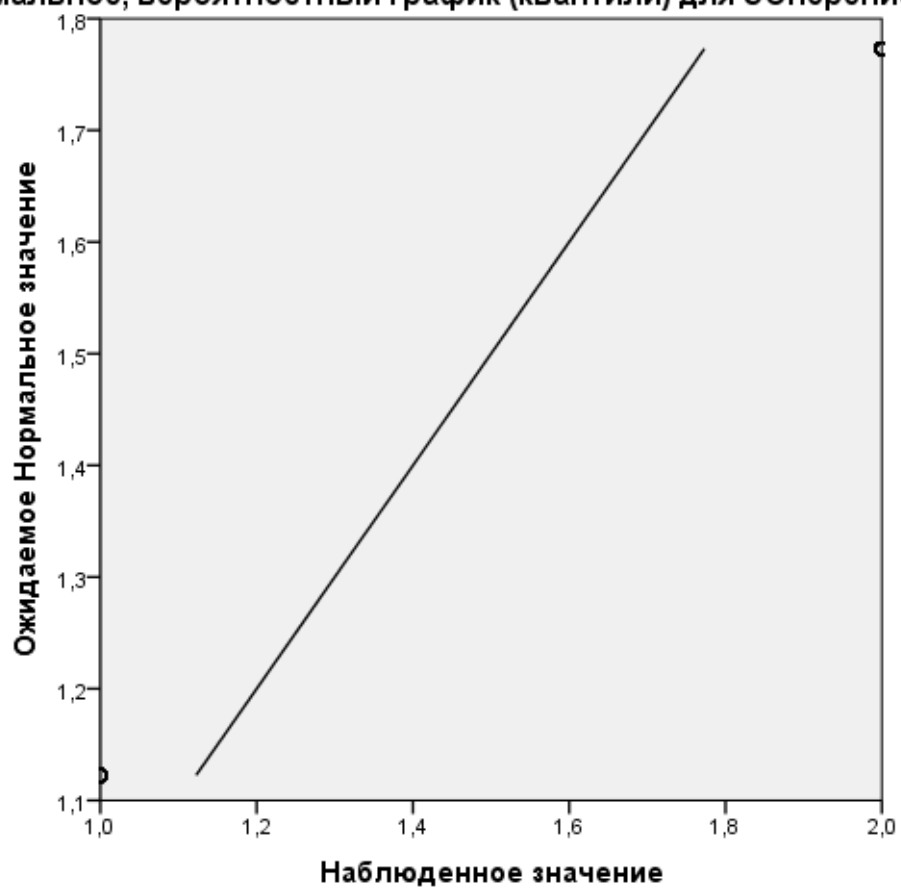



Нормальное, вероятностный график остатков (квантили) с удаленным трендом для ЭОпереписка

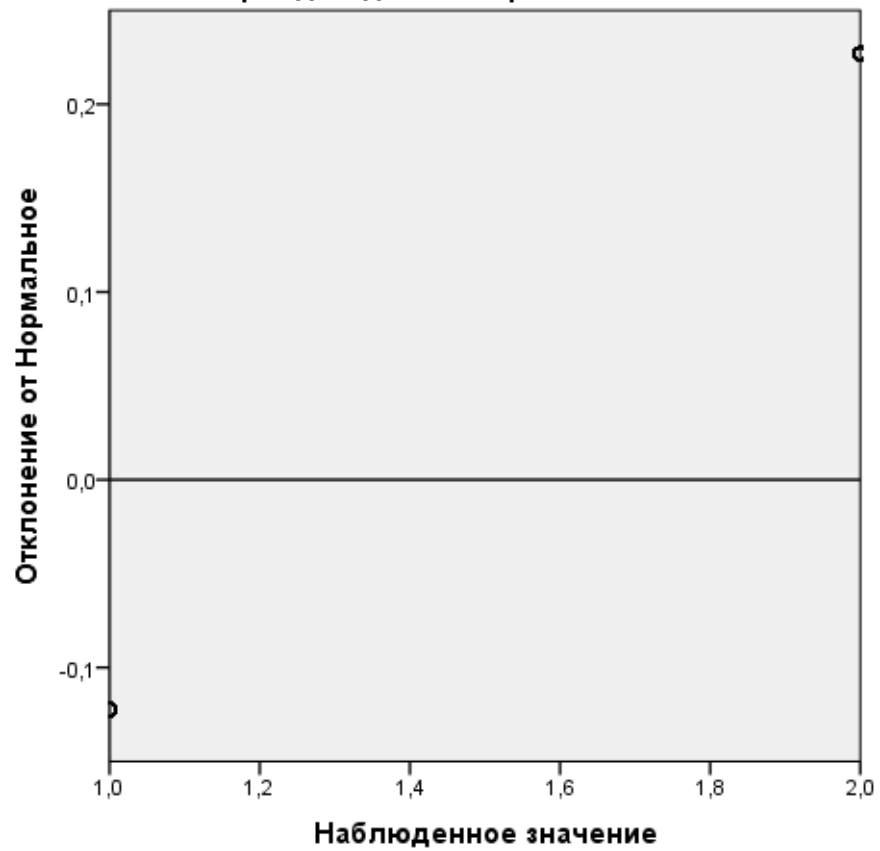

OLvideo recording

Нормальное, вероятностный график (квантили) для ЭОвидеозапись

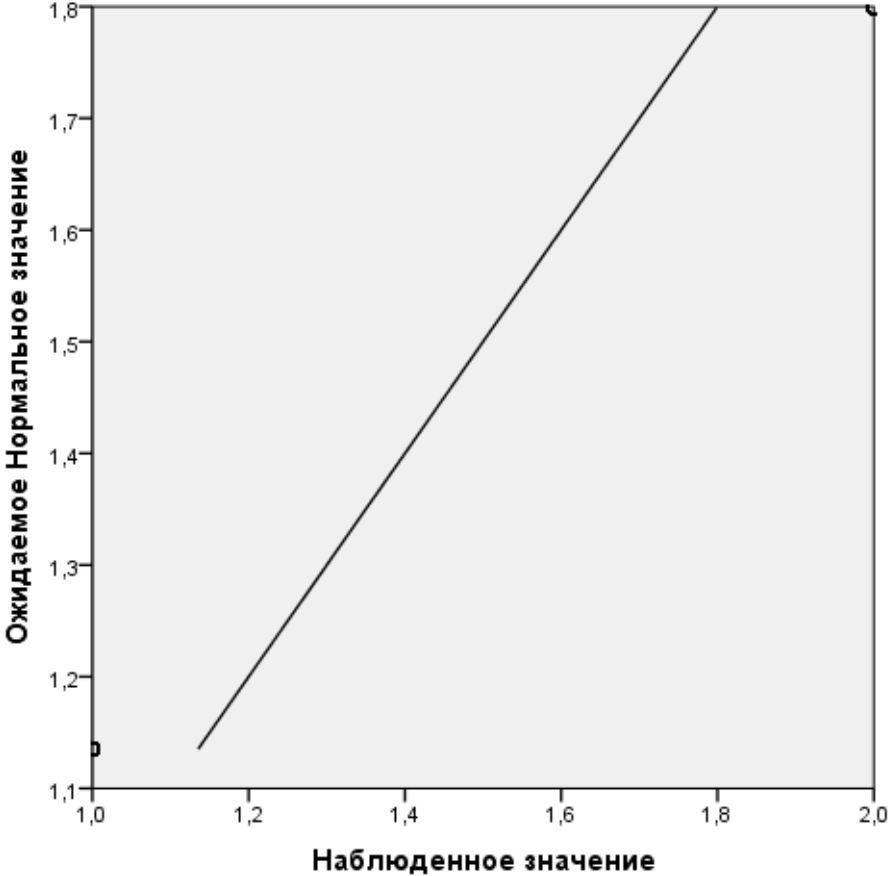

Нормальное, вероятностный график остатков (квантили) с удаленным трендом для ЭОвидеозапись

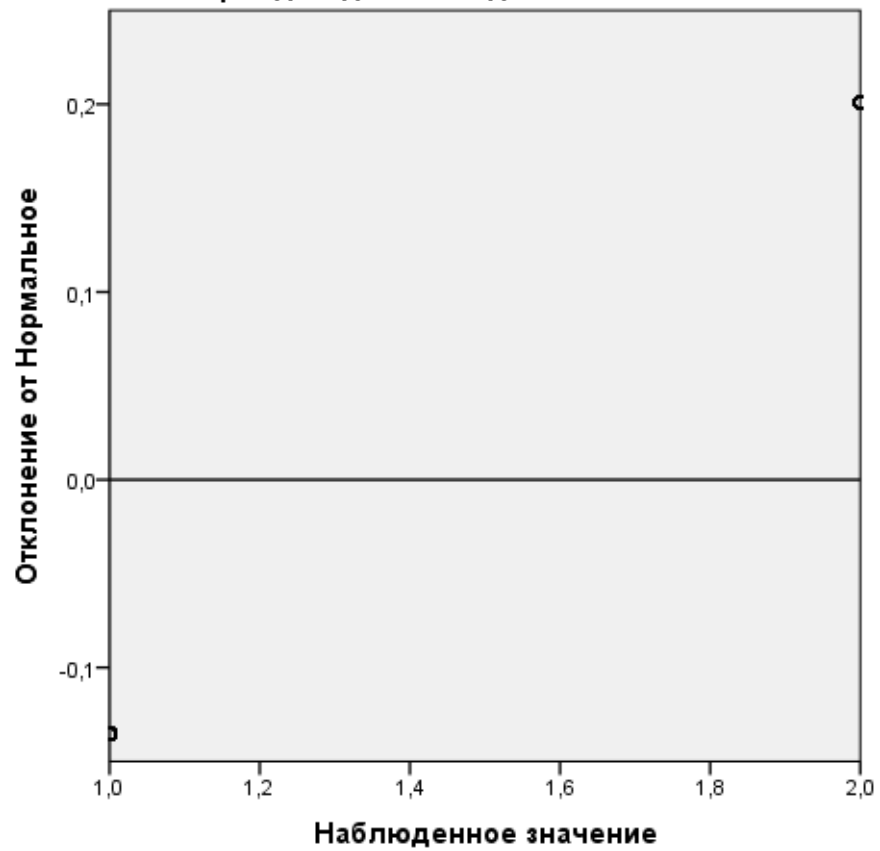

OLvideo meetings

Нормальное, вероятностный график (квантили) для ЭОвидеовстречи

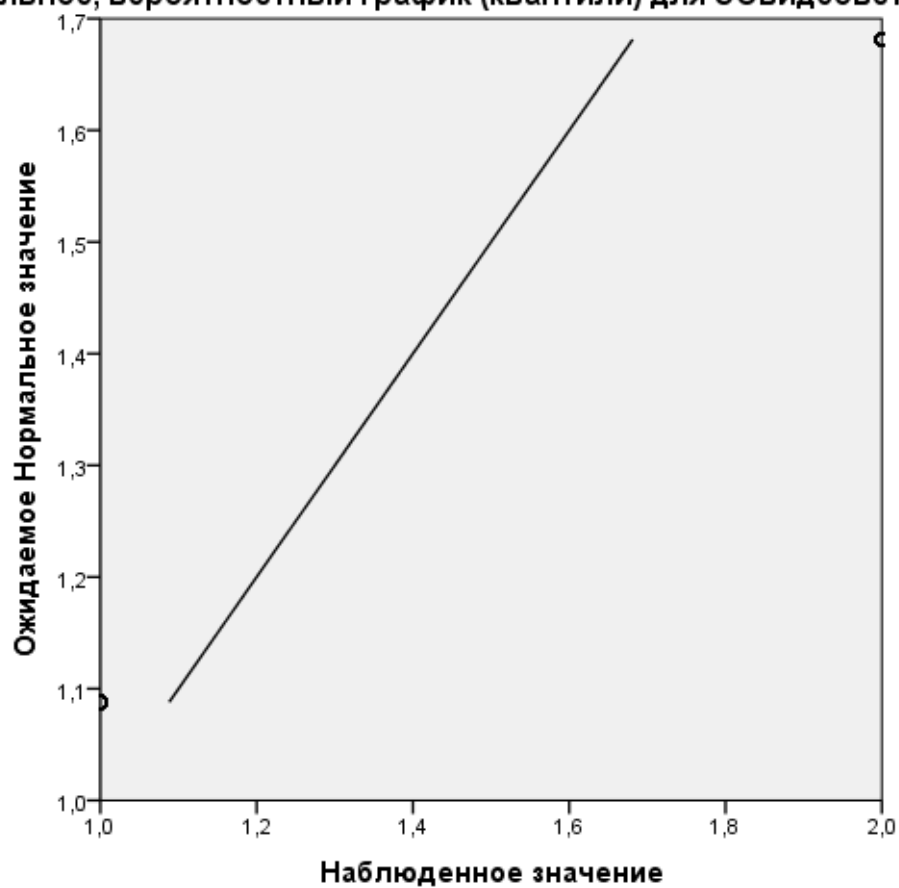

Нормальное, вероятностный график остатков (квантили) с удаленным трендом для ЭОвидеовстречи

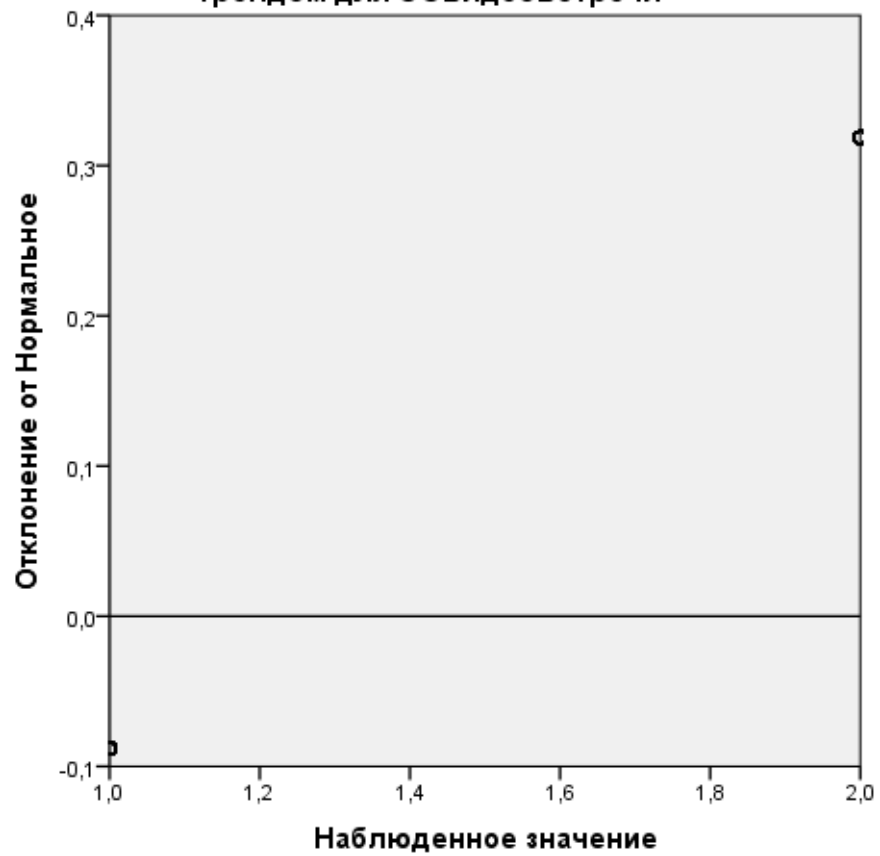

OLdopaudiovideo

Нормальное, вероятностный график (квантили) для ЭОдопаудиовидео

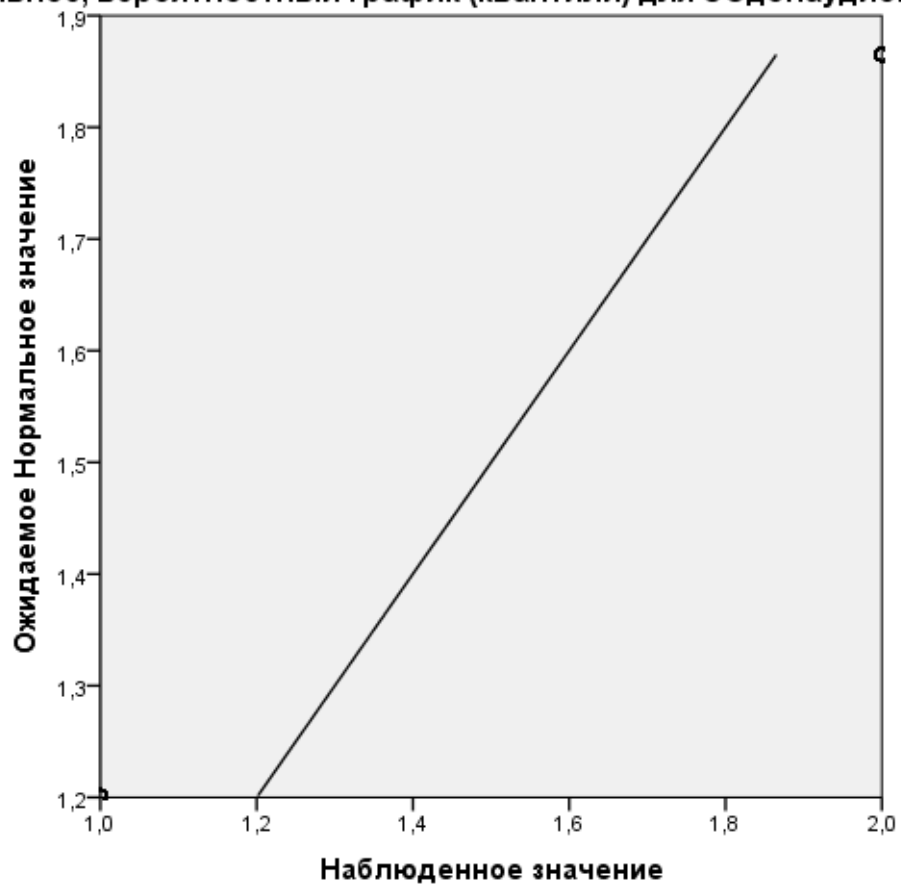

Нормальное, вероятностный график остатков (квантили) с удаленным трендом для ЭОдопаудиовидео

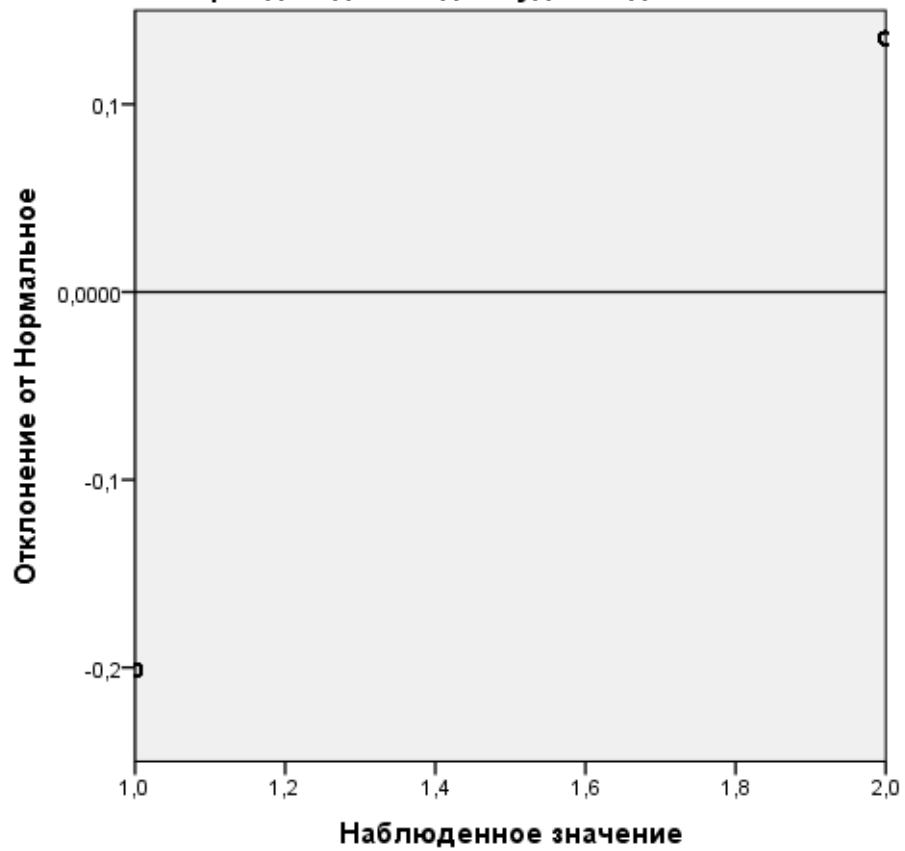

OLforms

Нормальное, вероятностный график (квантили) для ЭО формулы

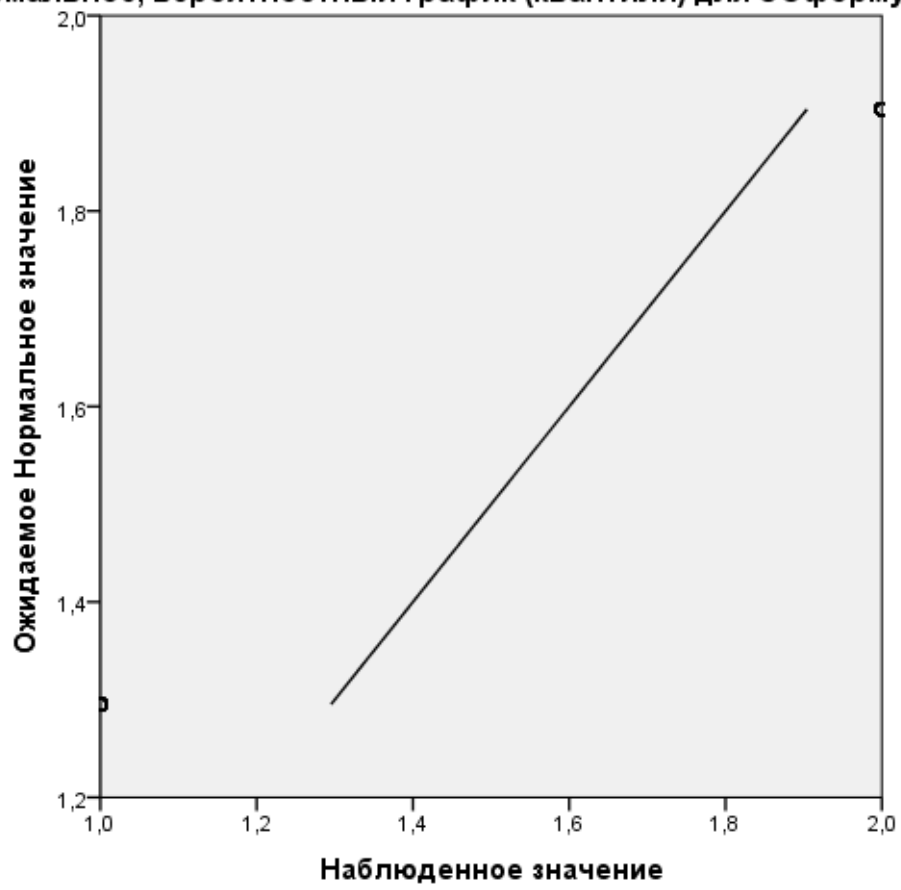



Нормальное, вероятностный график остатков (квантили) с удаленным трендом для ЭОформуы

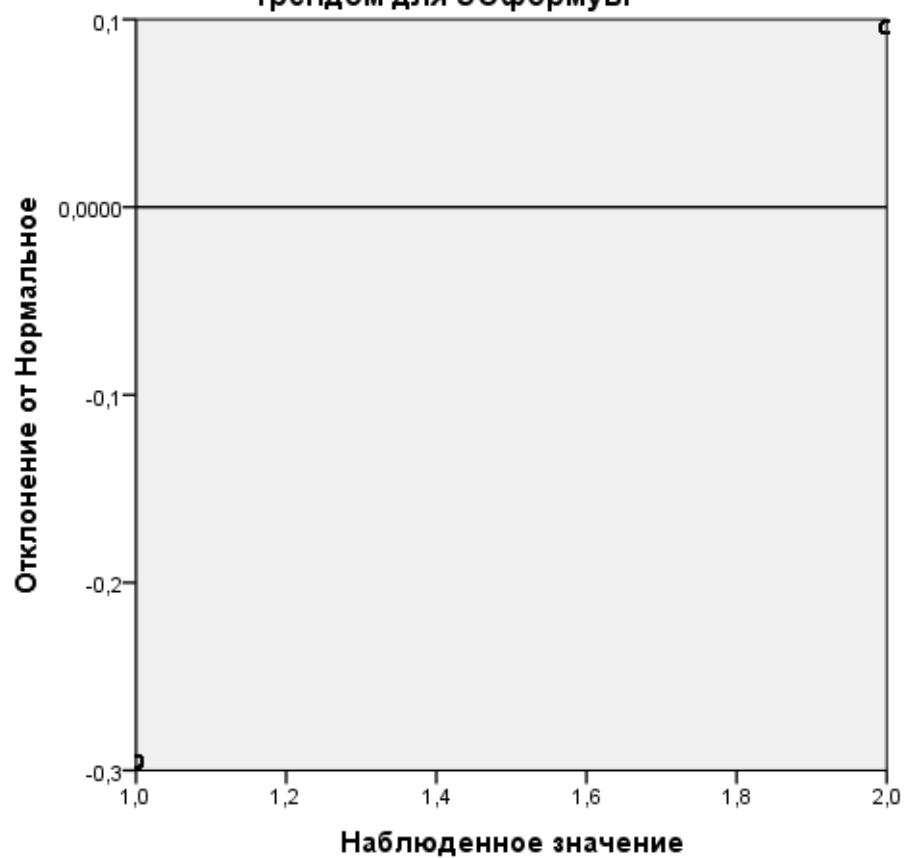

OLprojects

Нормальное, вероятностный график (квантили) для ЭОпроекты

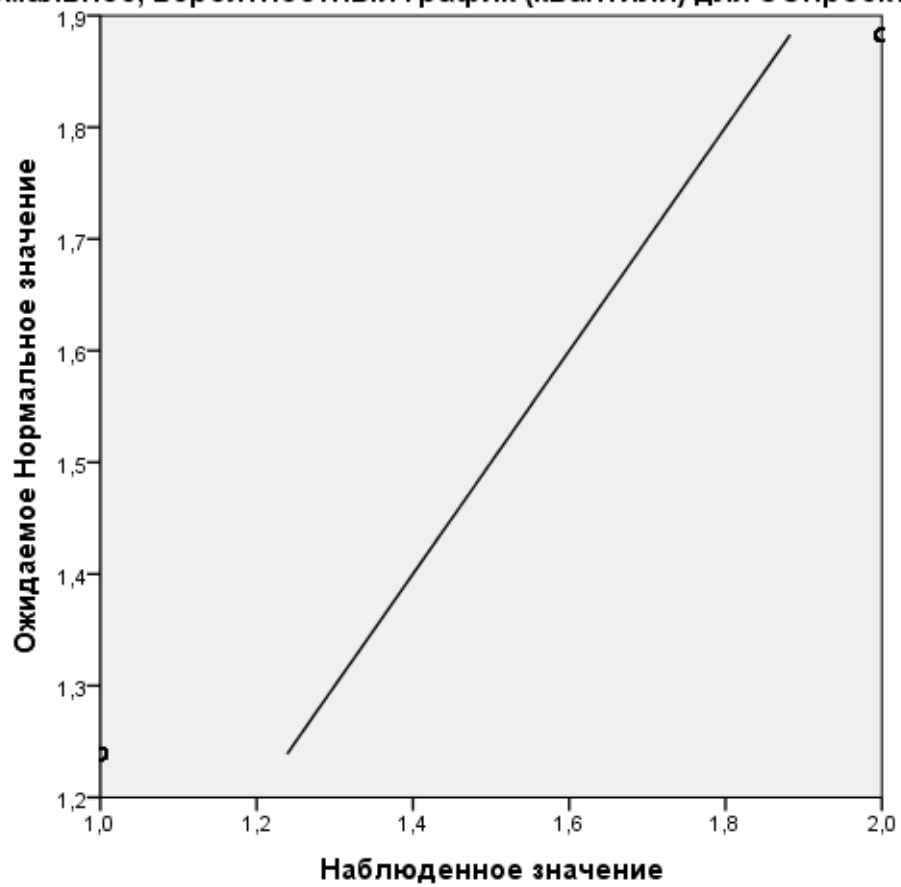

Нормальное, вероятностный график остатков (квантили) с удаленным трендом для ЭОпроекты

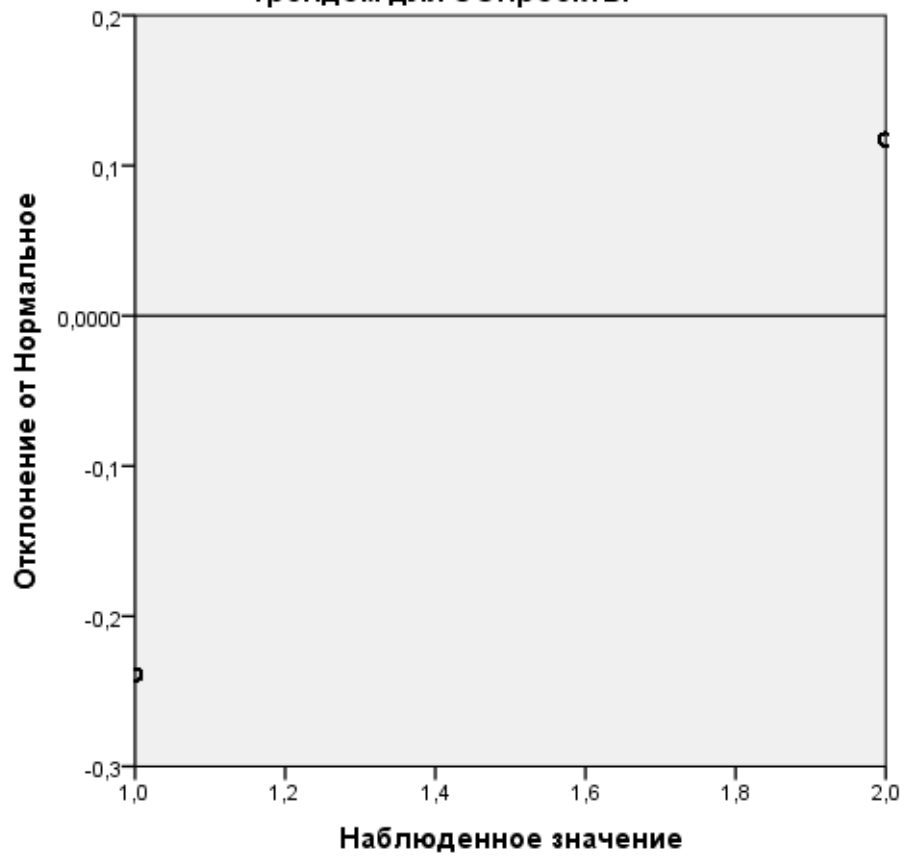

Нормальное, вероятностный график (квантили) для ЭОучебники

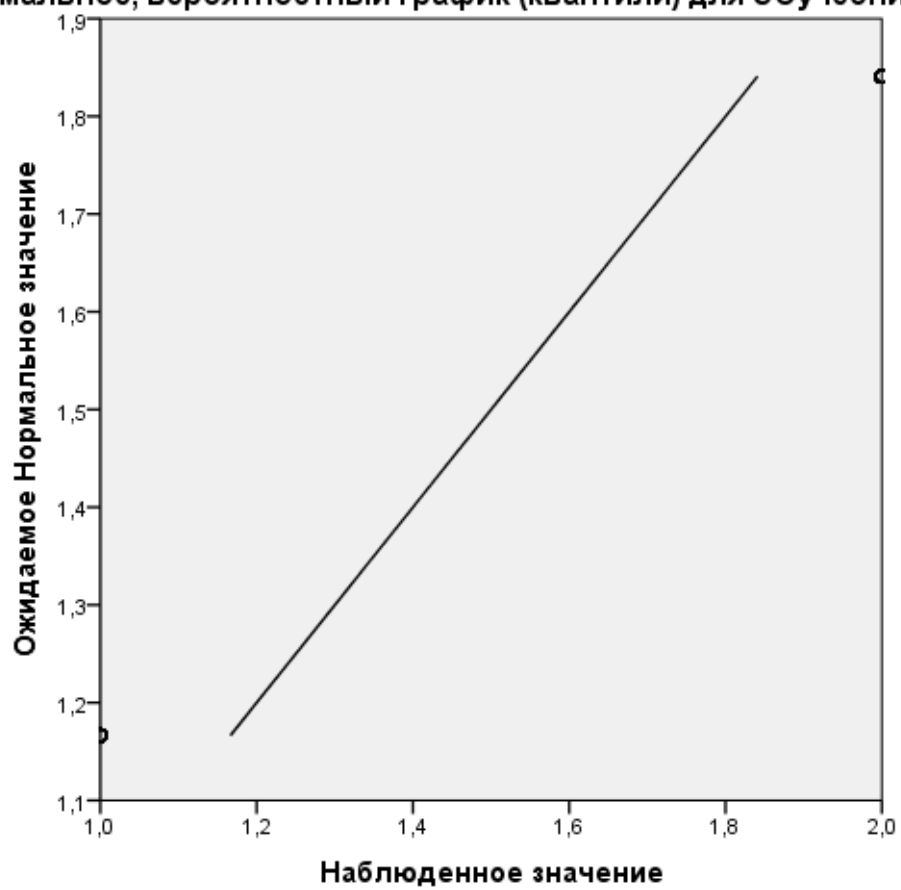

Нормальное, вероятностный график остатков (квантили) с удаленным трендом для ЭОучебники

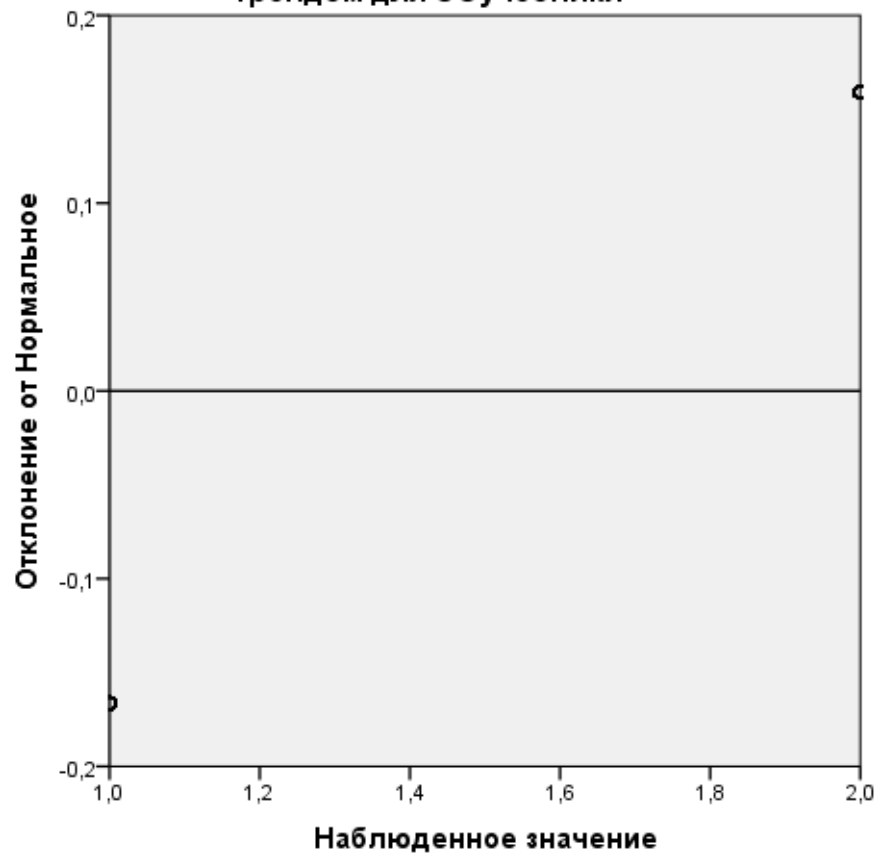

OLtesting

Нормальное, вероятностный график (квантили) для ЭОтестирование

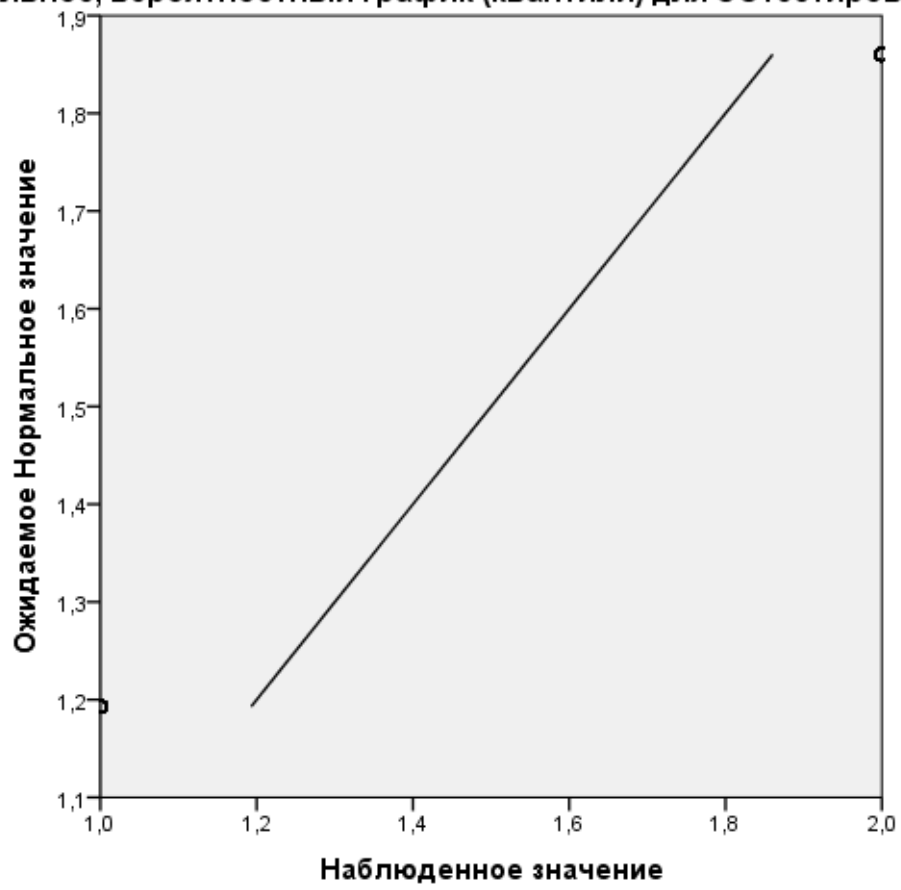

Нормальное, вероятностный график остатков (квантили) с удаленным трендом для ЭОтестирование

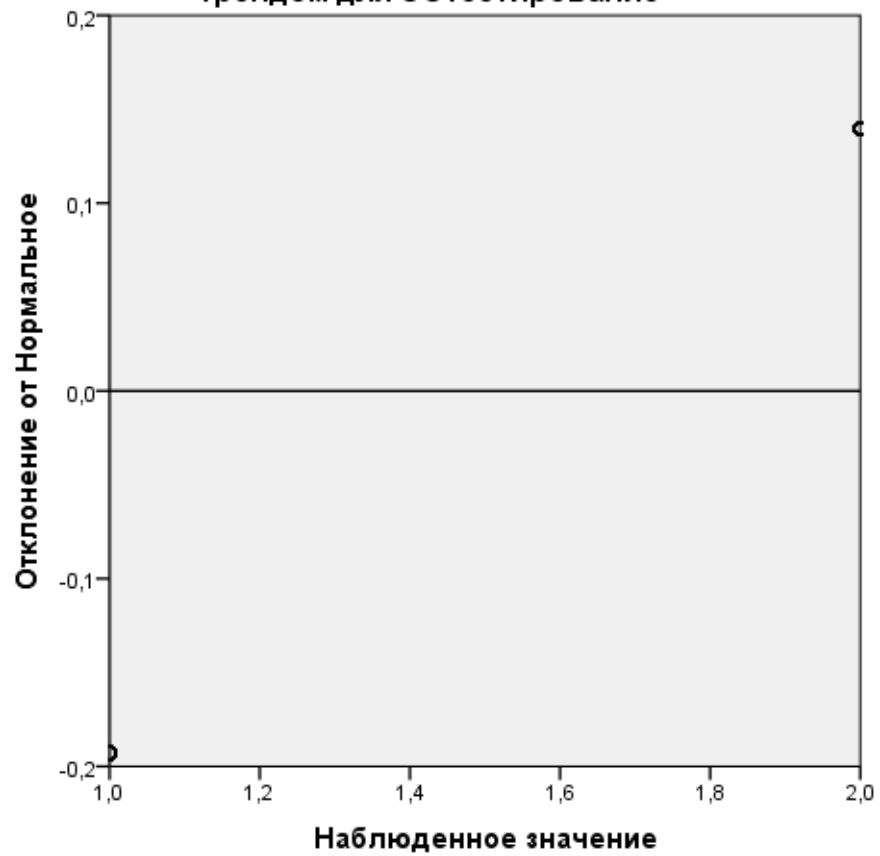

OLapplications

Нормальное, вероятностный график (квантили) для ЭОприложения

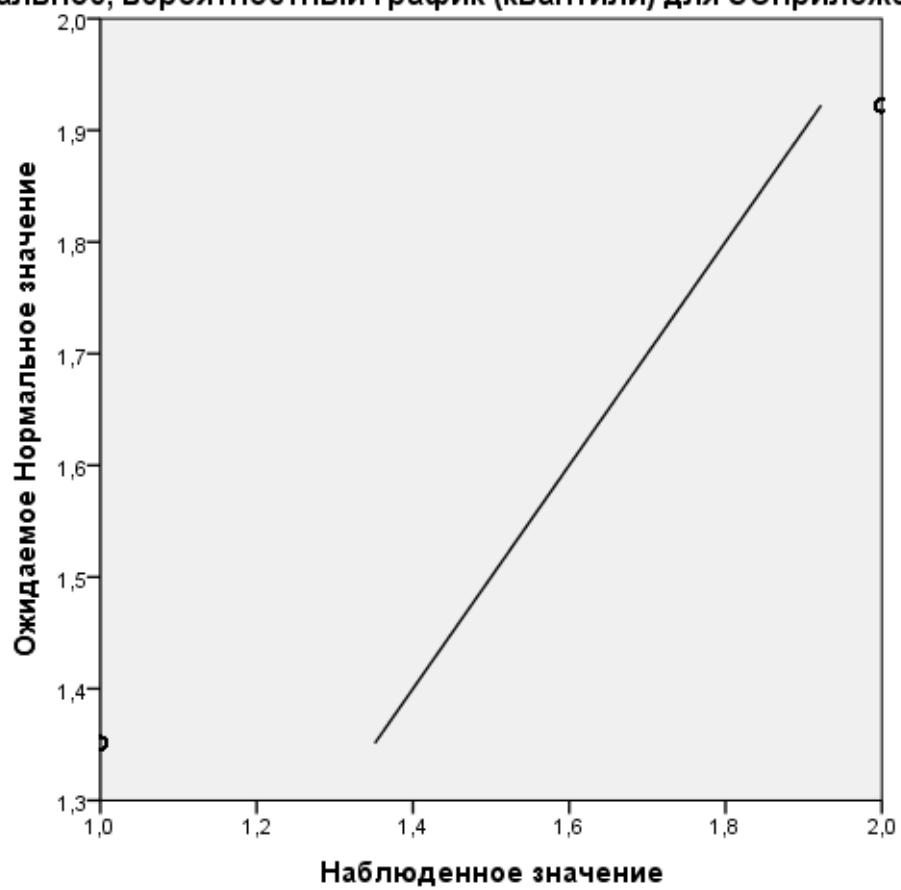



Нормальное, вероятностный график остатков (квантили) с удаленным трендом для ЭОприложения

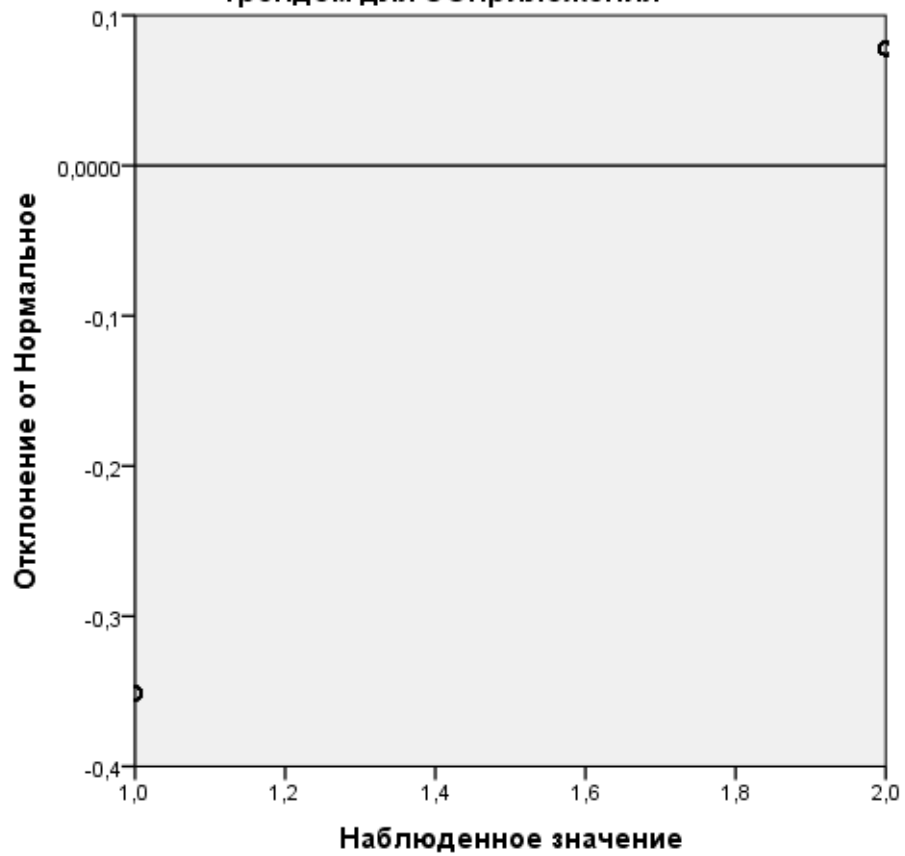

SATISFACTION

Нормальное, вероятностный график (квантили) для УДОВЛЕТВОРЕННОСТЬ

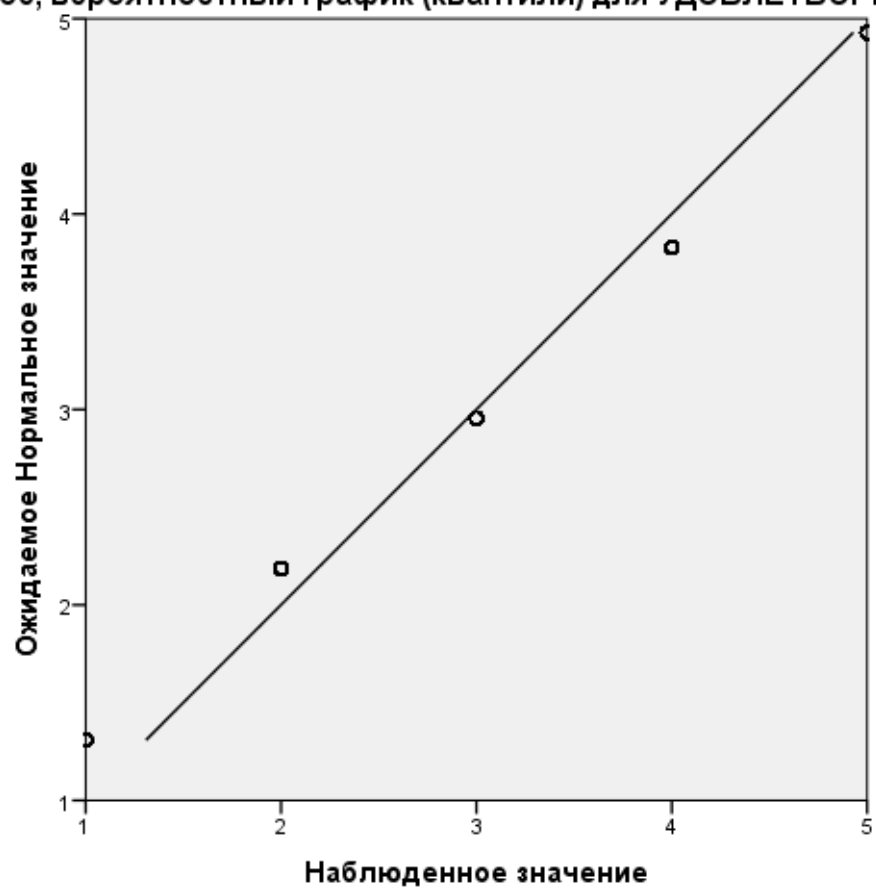

Нормальное, вероятностный график остатков (квантили) с удаленным трендом для УДОВЛЕТВОРЕННОСТЬ

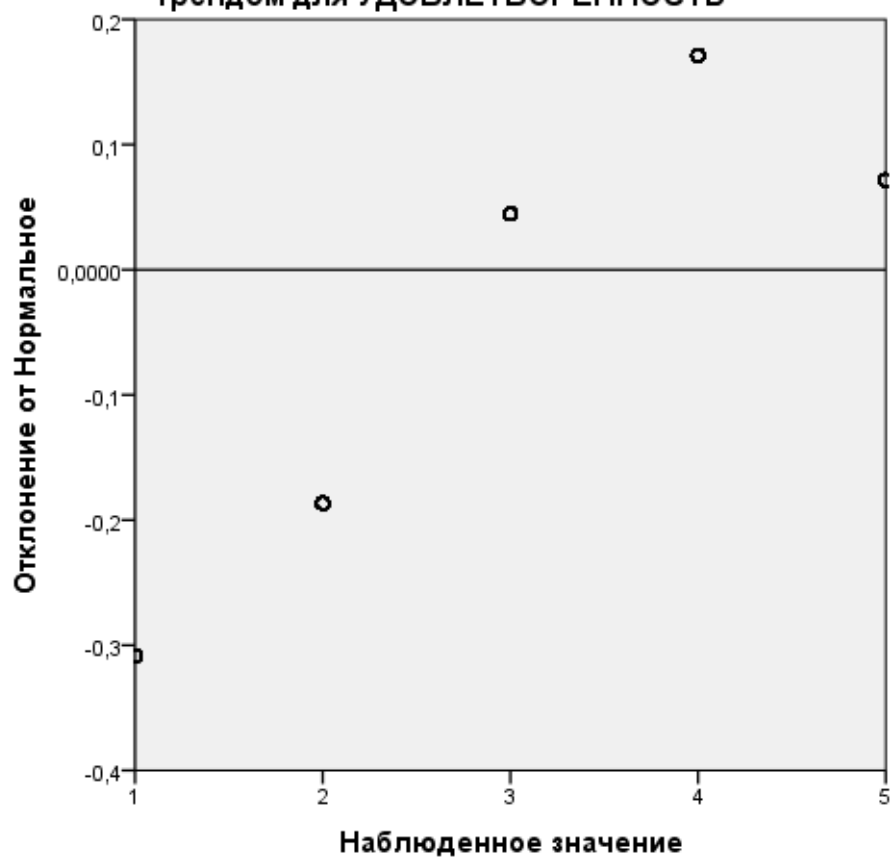

TPA1

Нормальное, вероятностный график (квантили) для ТРА1

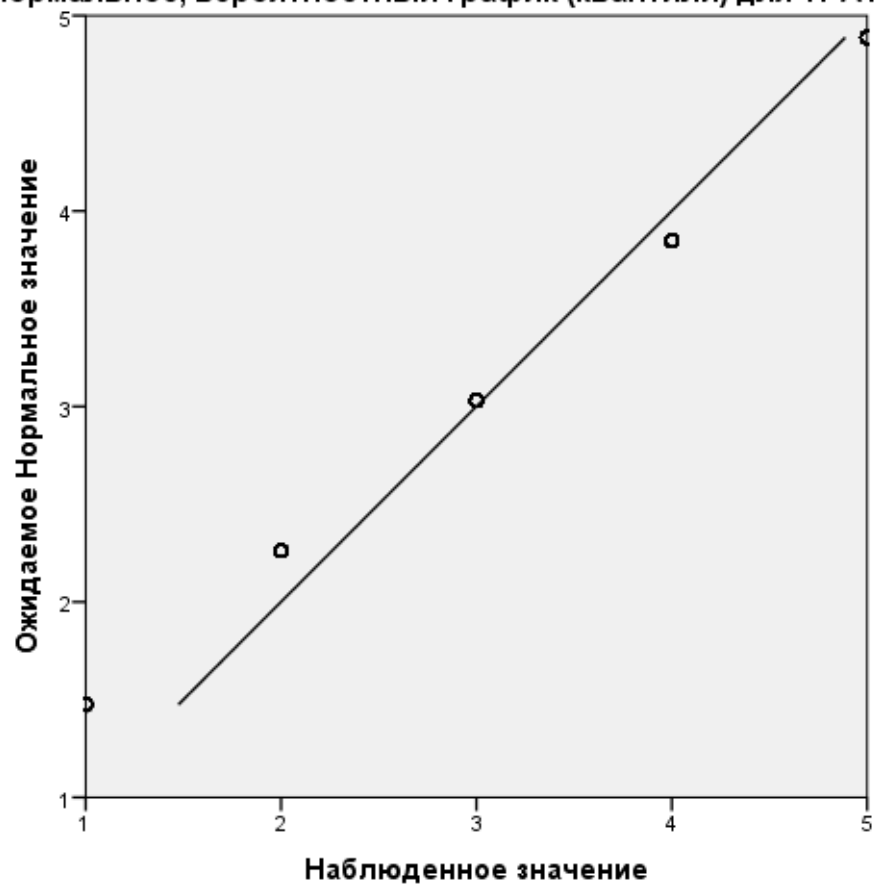

Нормальное, вероятностный график остатков (квантили) с удаленным трендом для ТРА1

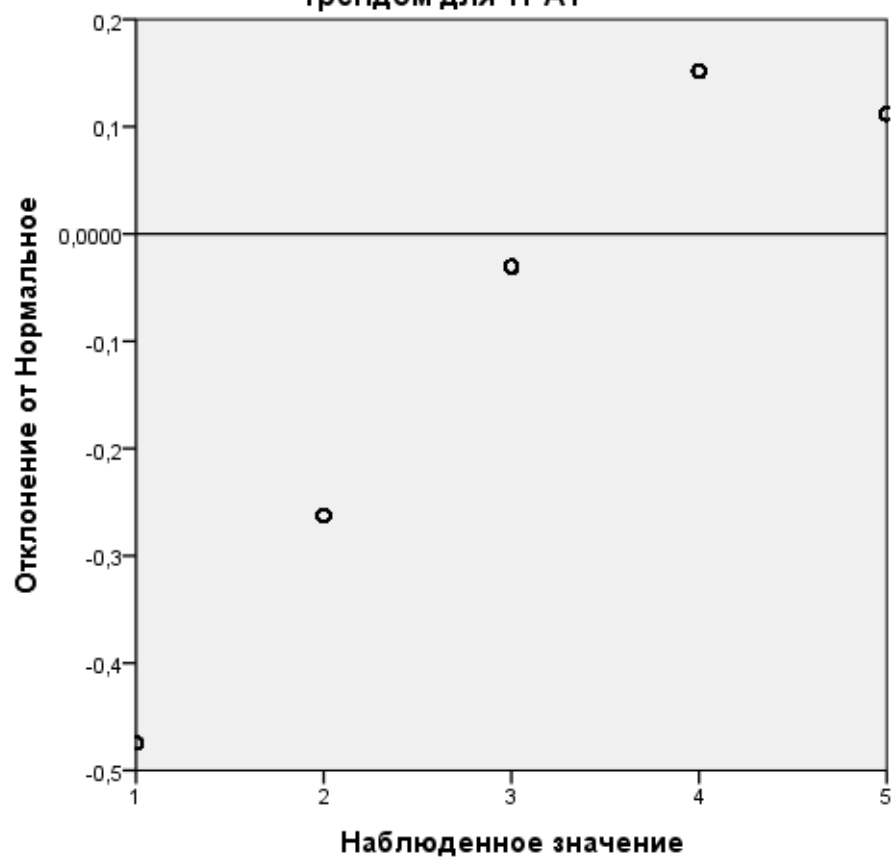

TPA2

Нормальное, вероятностный график (квантили) для ТРА2

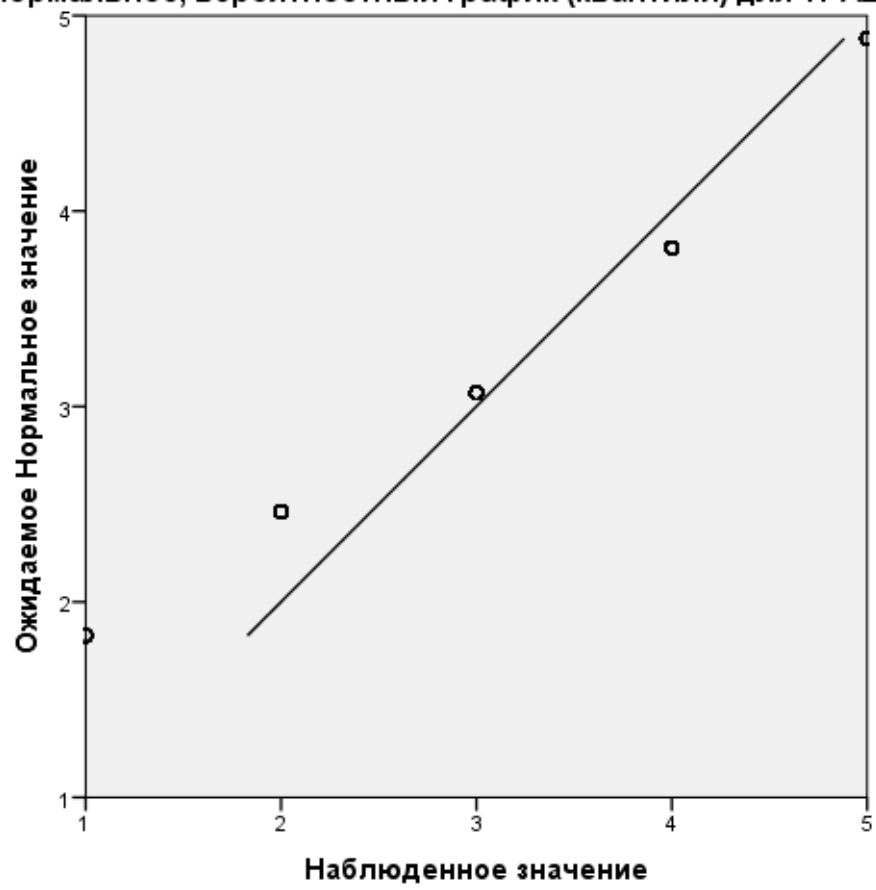

Нормальное, вероятностный график остатков (квантили) с удаленным трендом для ТРА2

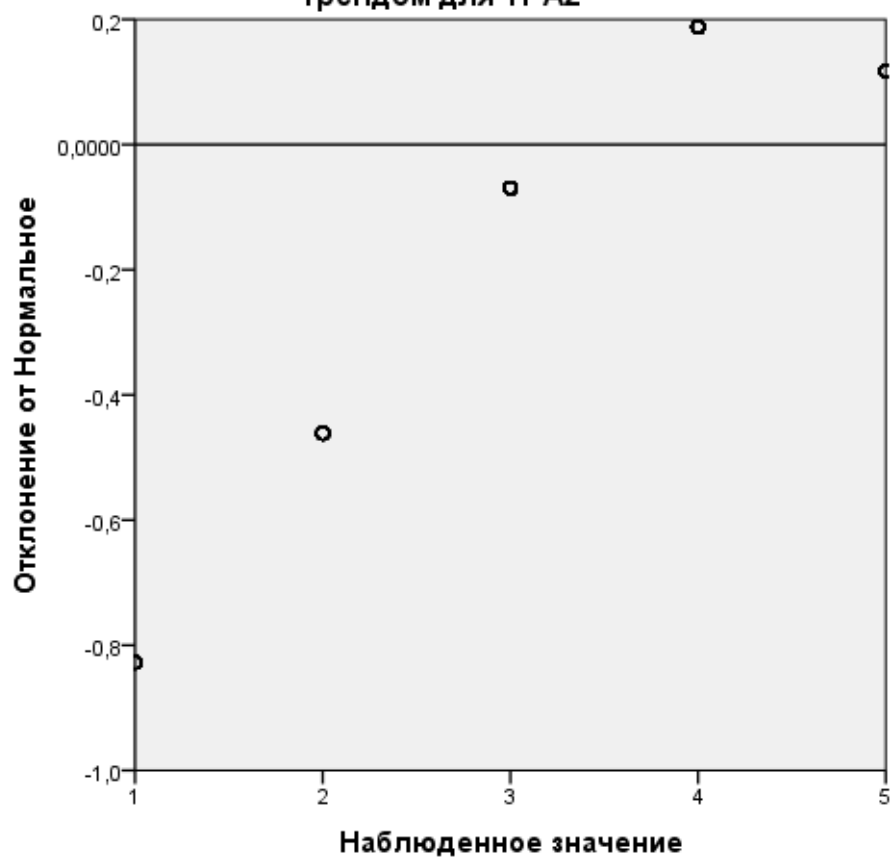

ТРА3

Нормальное, вероятностный график (квантили) для ТРАЗ

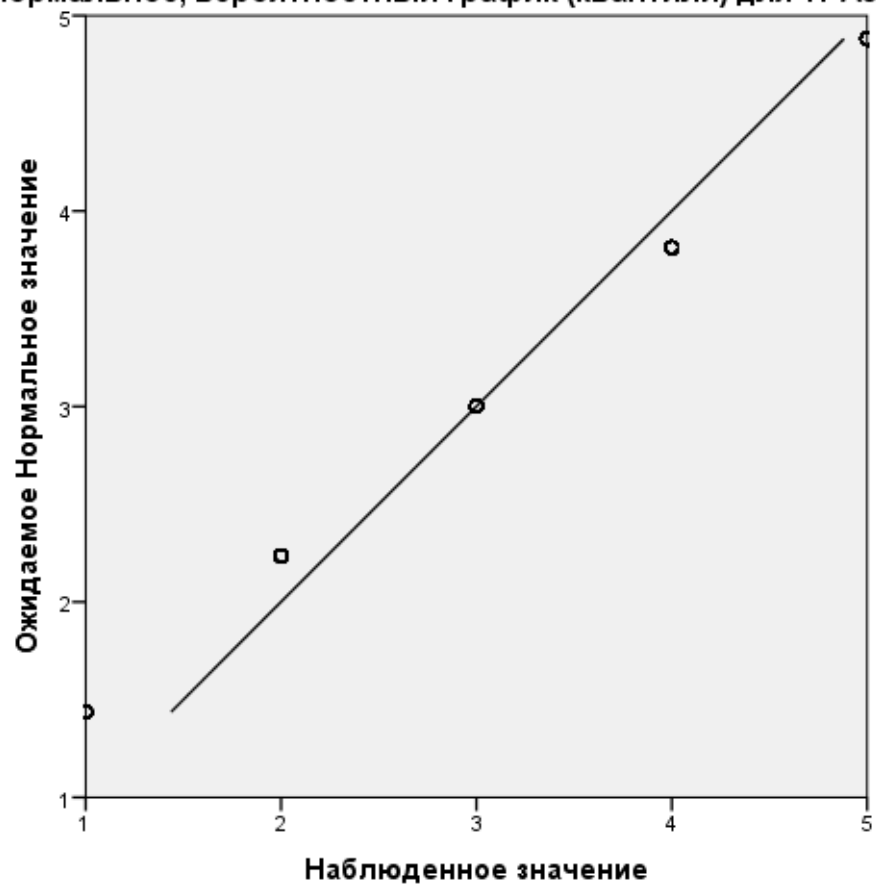



Нормальное, вероятностный график остатков (квантили) с удаленным трендом для ТРАЗ

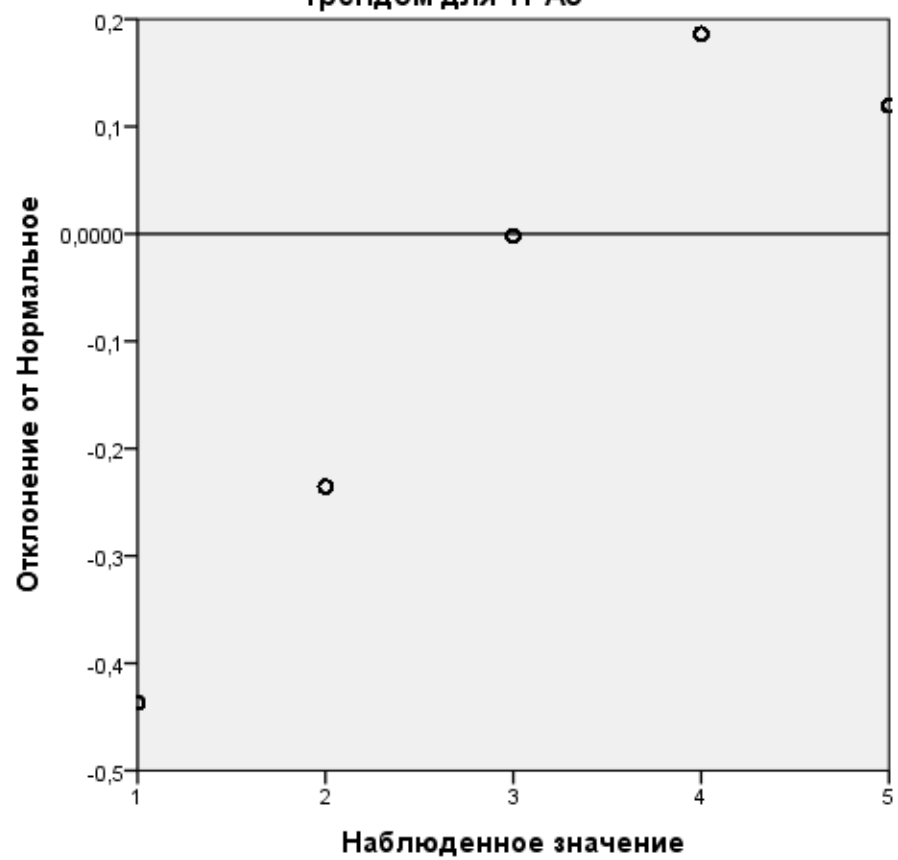

TPA4

Нормальное, вероятностный график (квантили) для ТРА4

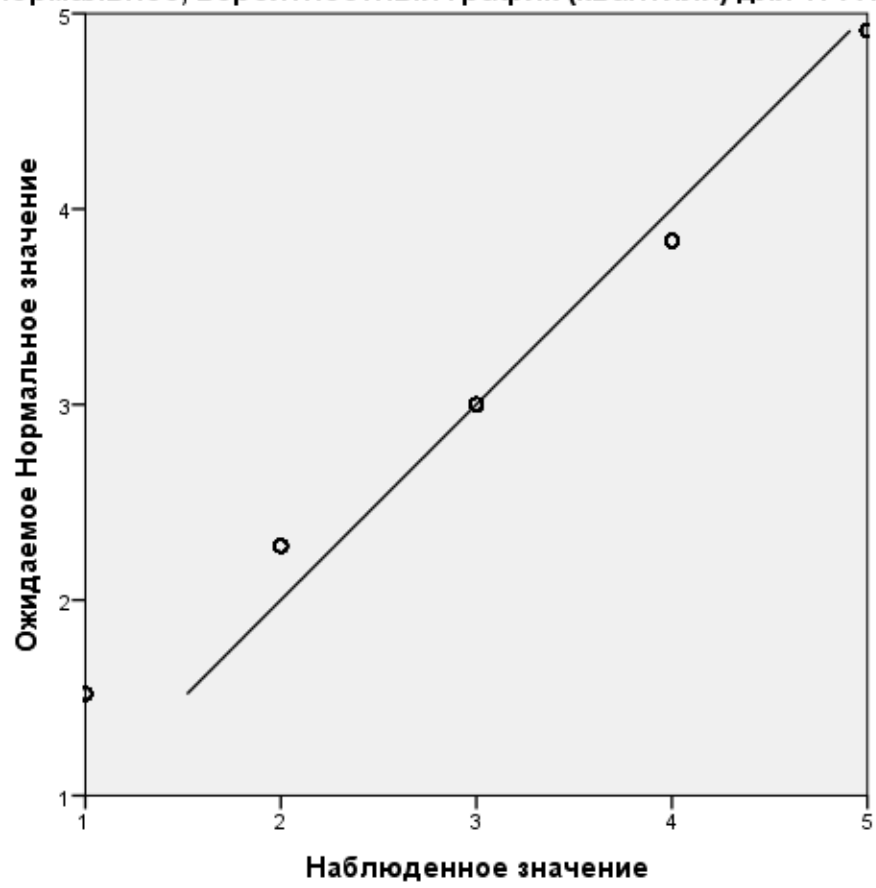

Нормальное, вероятностный график остатков (квантили) с удаленным трендом для ТРА4

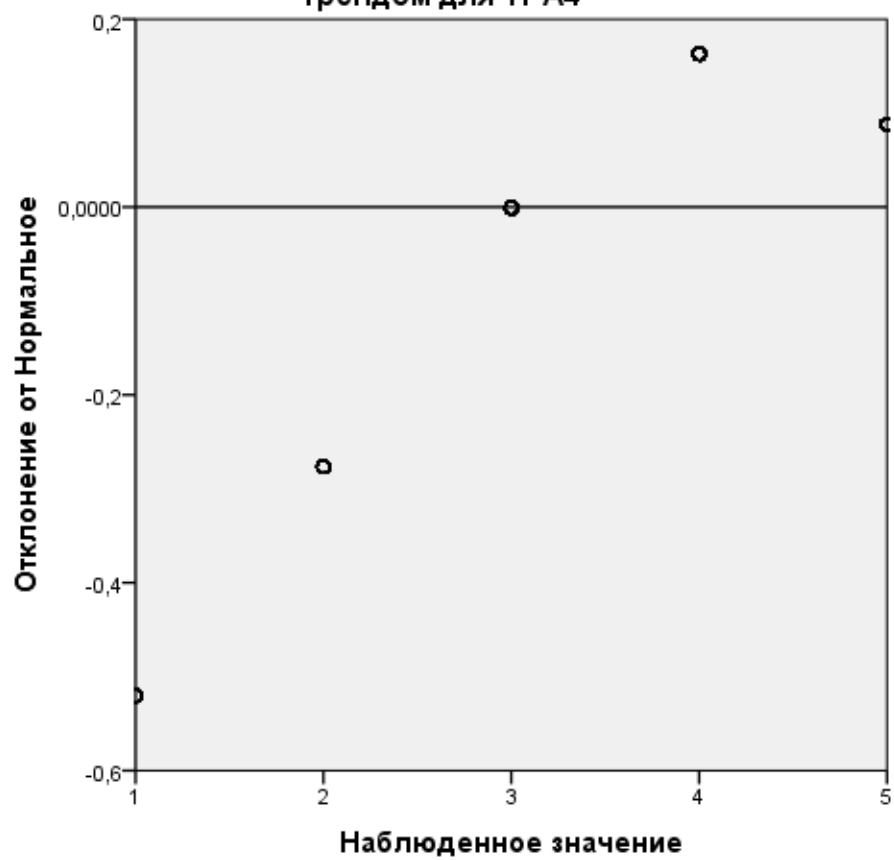

TPA5

Нормальное, вероятностный график (квантили) для ТРА5

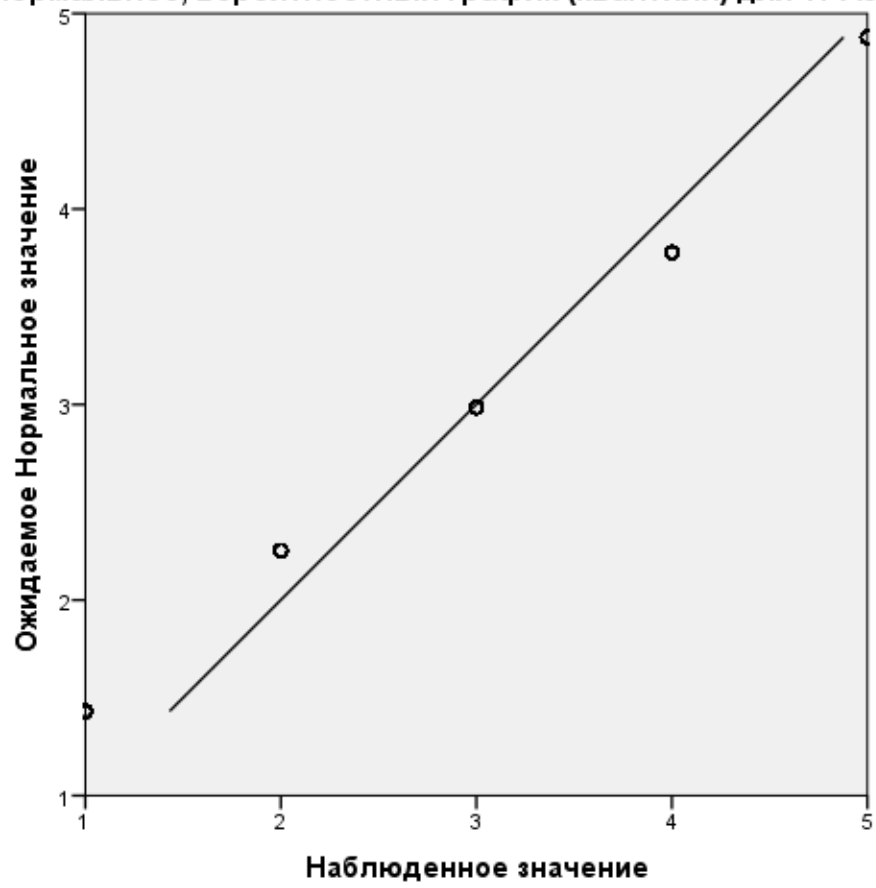

Нормальное, вероятностный график остатков (квантили) с удаленным трендом для ТРА5

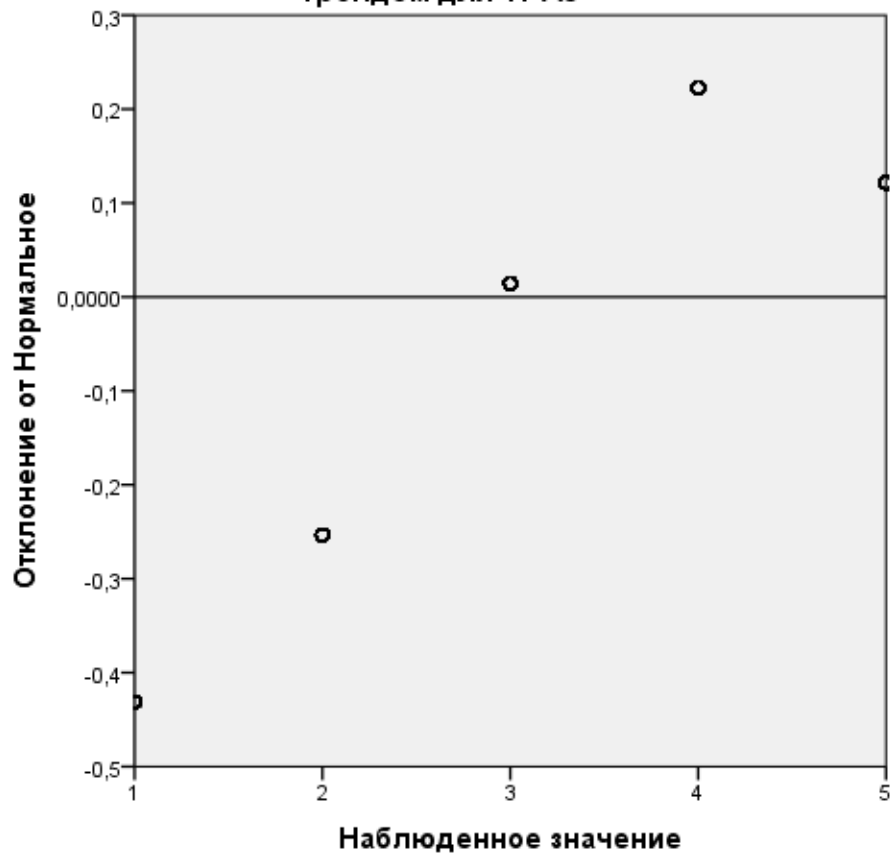

TPA6

Нормальное, вероятностный график (квантили) для ТРА6

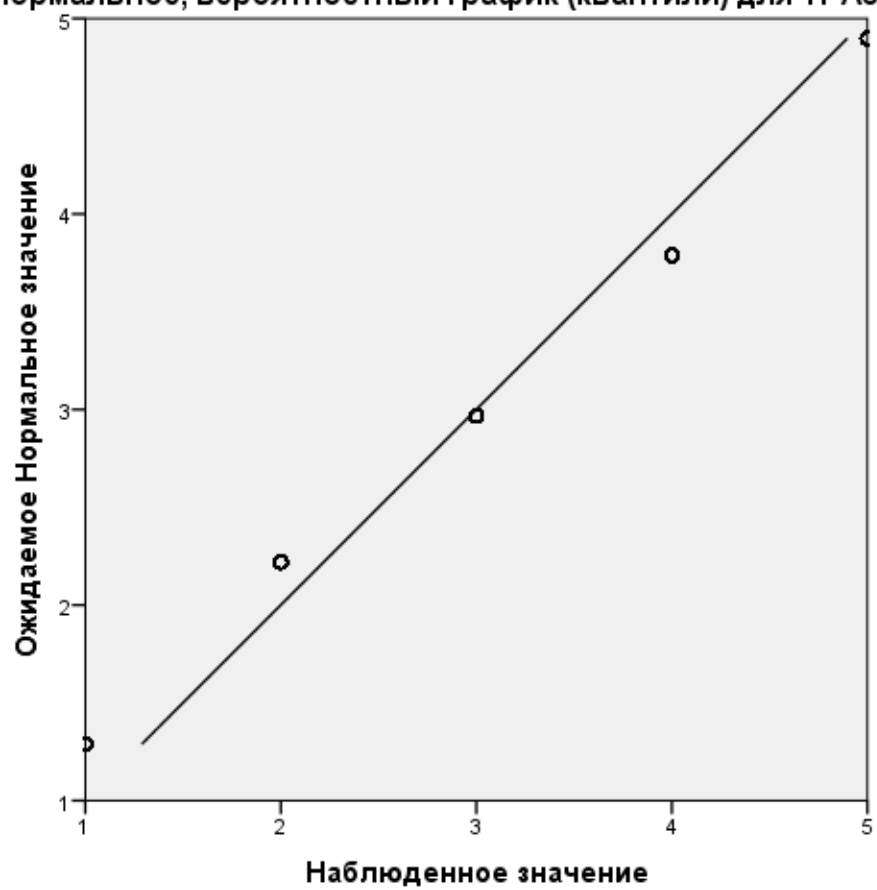

Нормальное, вероятностный график остатков (квантили) с удаленным трендом для ТРА6

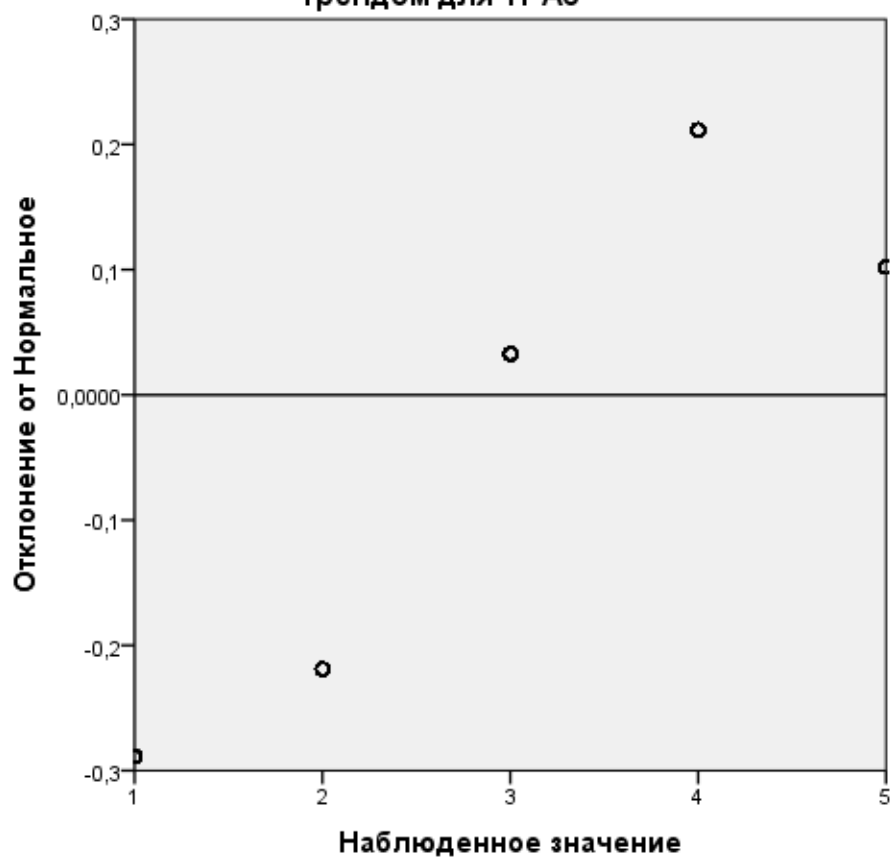

ТРА

Нормальное, вероятностный график (квантили) для ТРА

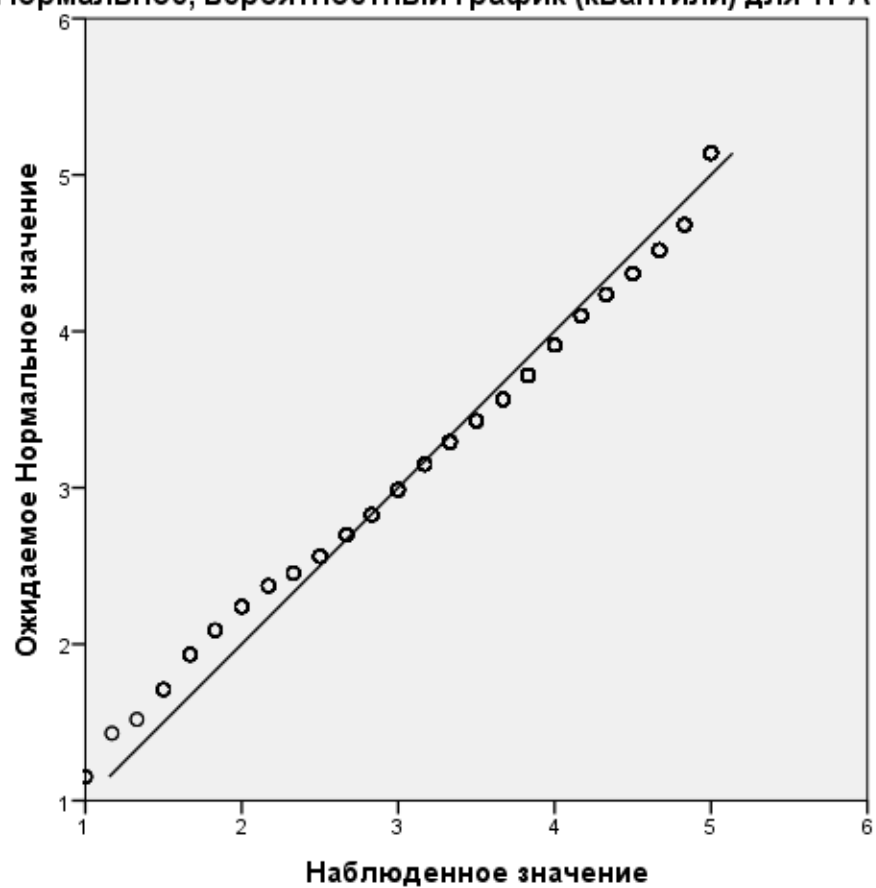



Нормальное, вероятностный график остатков (квантили) с удаленным трендом для ТРА

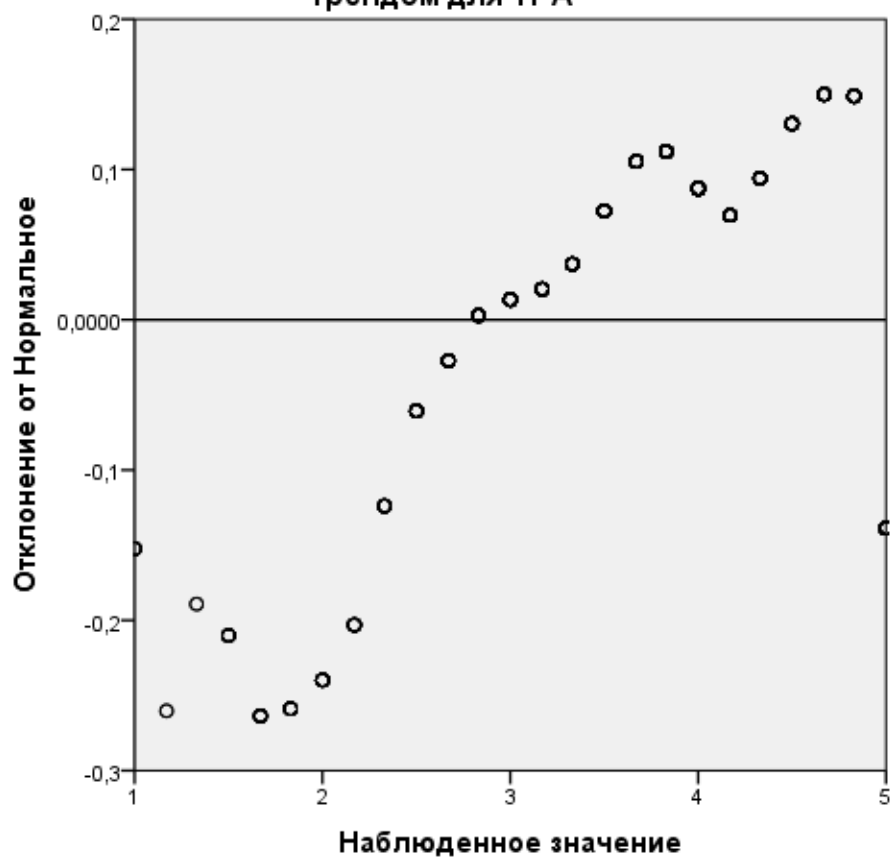

SPA1

Нормальное, вероятностный график (квантили) для SPA1

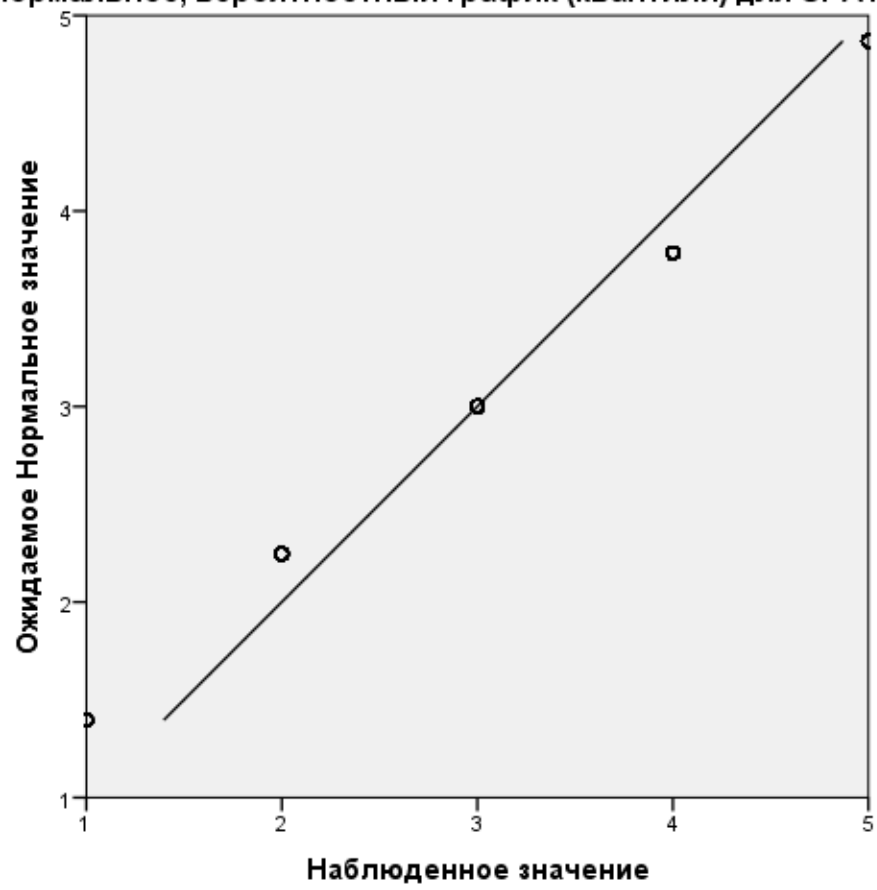

Нормальное, вероятностный график остатков (квантили) с удаленным трендом для SPA1

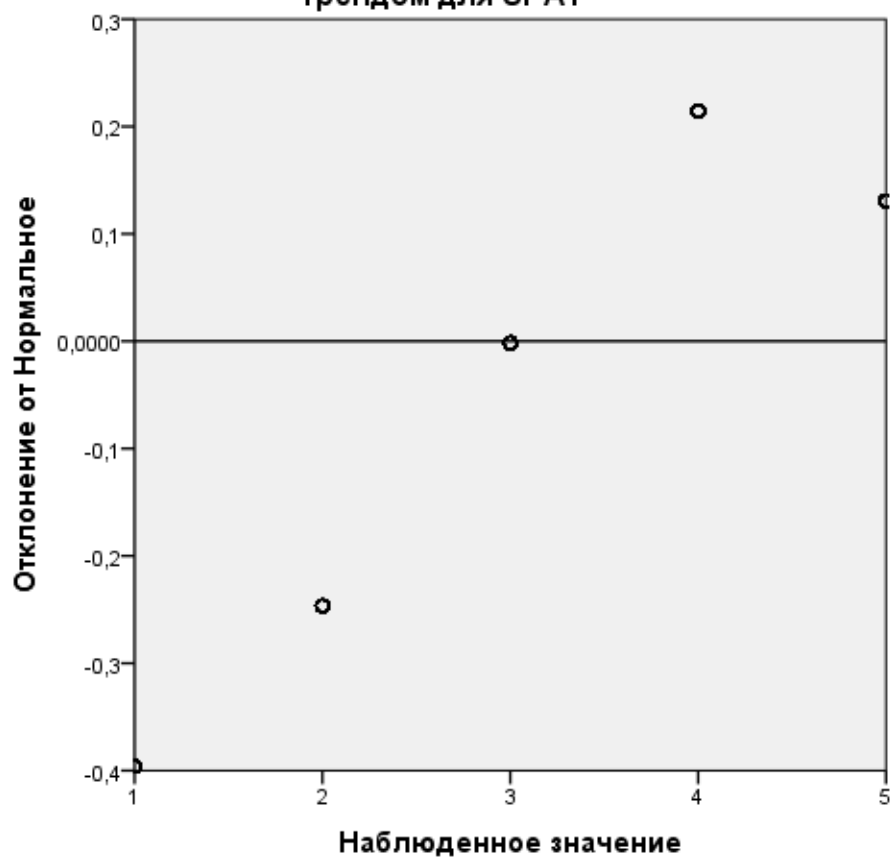

SPA2

Нормальное, вероятностный график (квантили) для SPA2

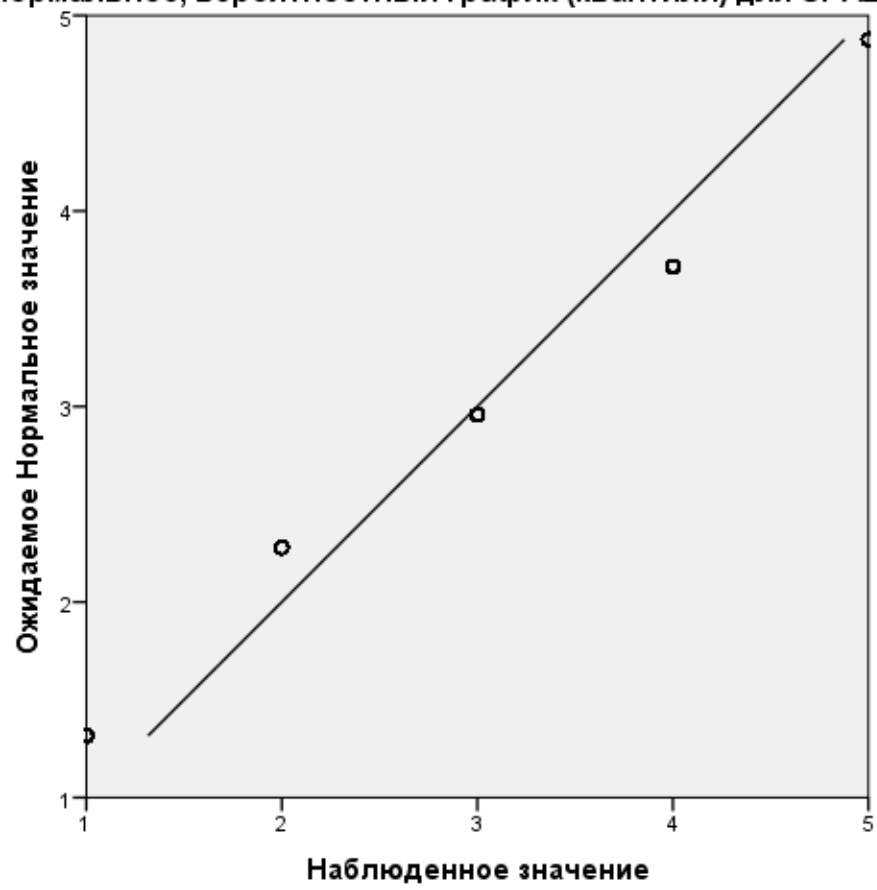

Нормальное, вероятностный график остатков (квантили) с удаленным трендом для SPA2

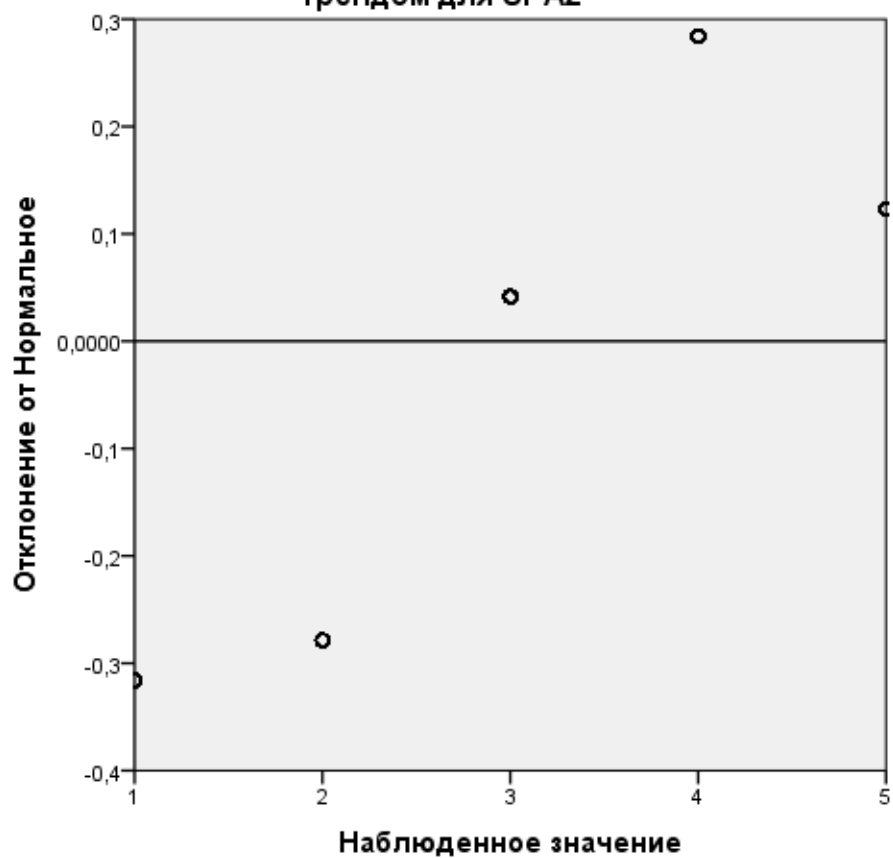

SPA3

Нормальное, вероятностный график (квантили) для SPA3

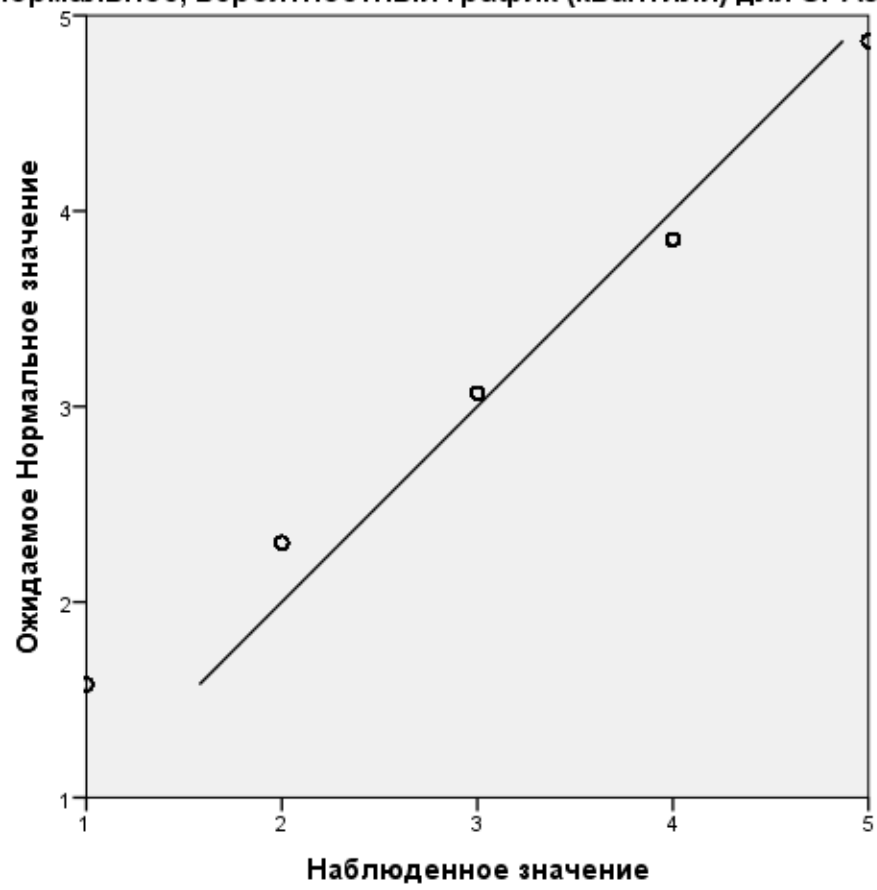

Нормальное, вероятностный график остатков (квантили) с удаленным трендом для SPA3

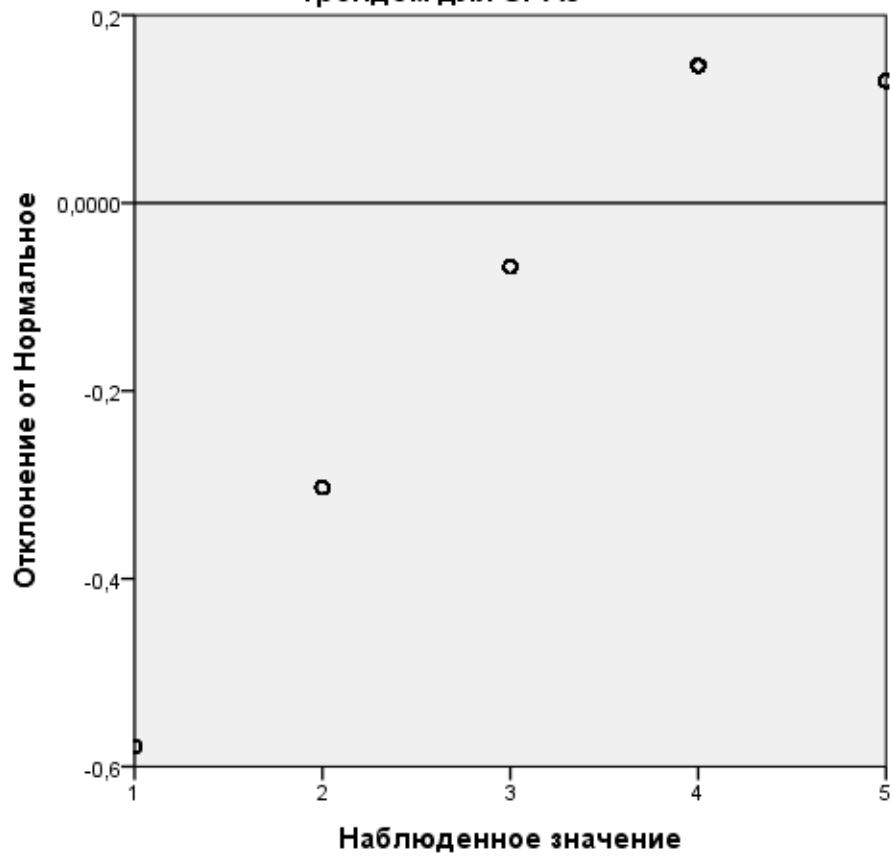

SPA4

Нормальное, вероятностный график (квантили) для SPA4

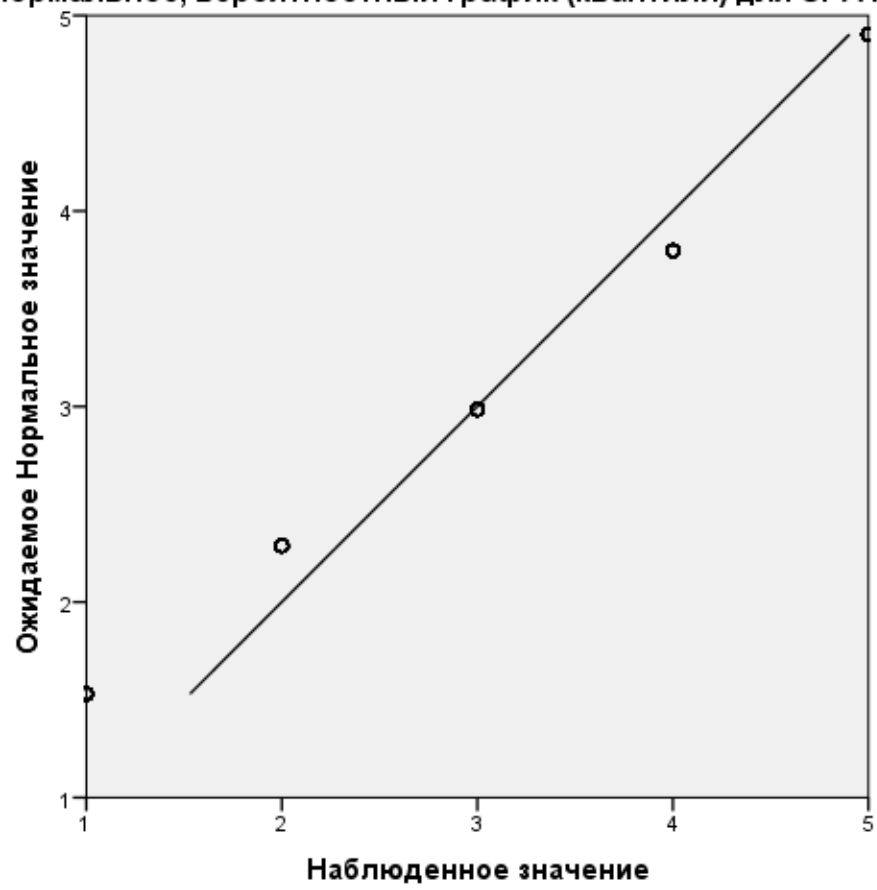



Нормальное, вероятностный график остатков (квантили) с удаленным трендом для SPA4

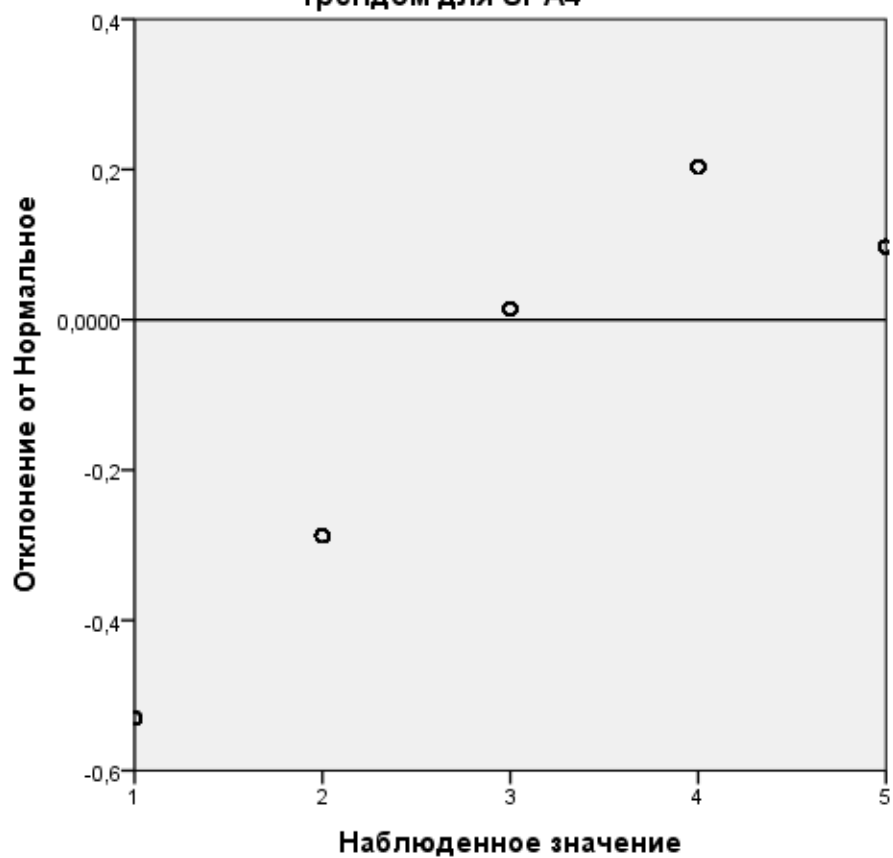

SPA5

Нормальное, вероятностный график (квантили) для SPA5

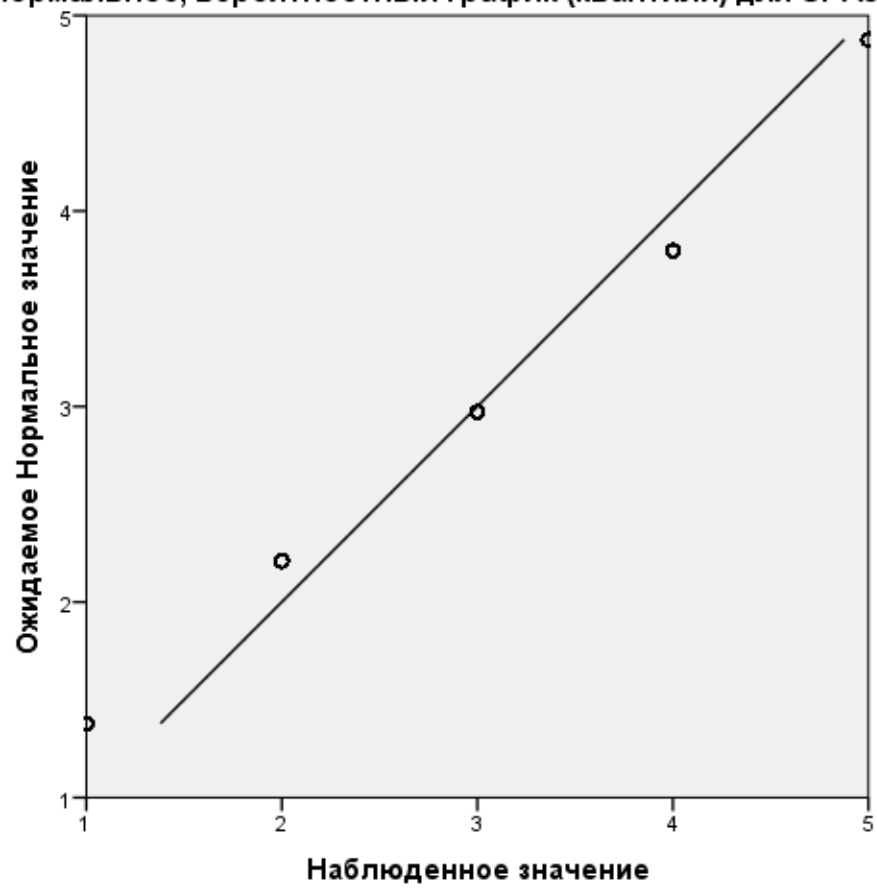

Нормальное, вероятностный график остатков (квантили) с удаленным трендом для SPA5

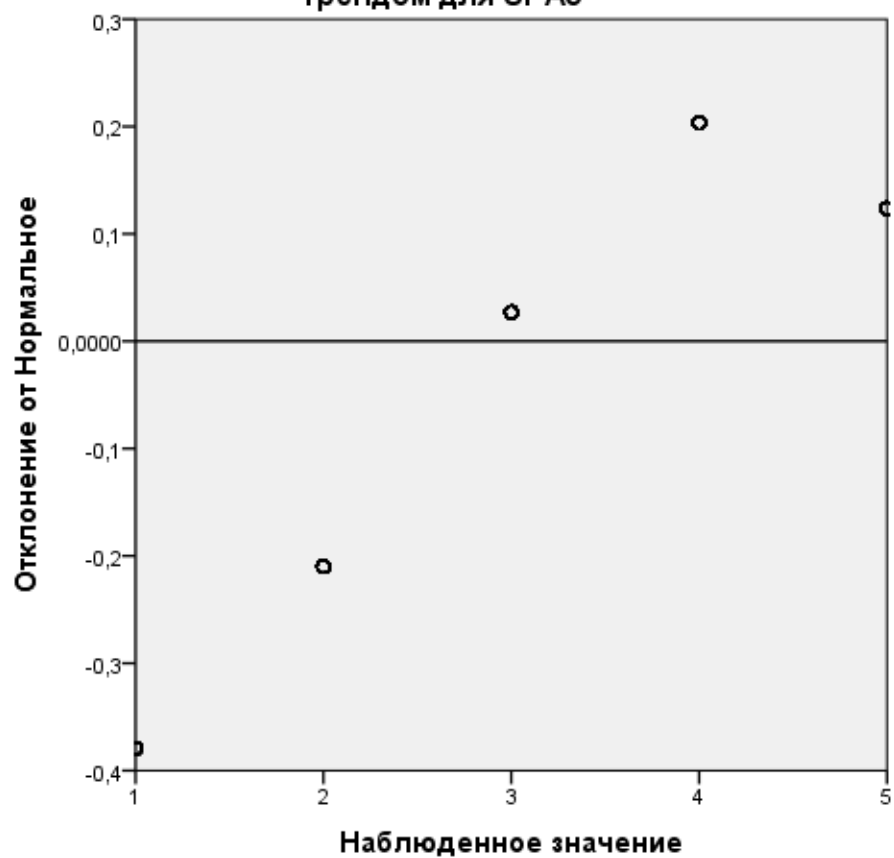

SPA6

Нормальное, вероятностный график (квантили) для SPA6

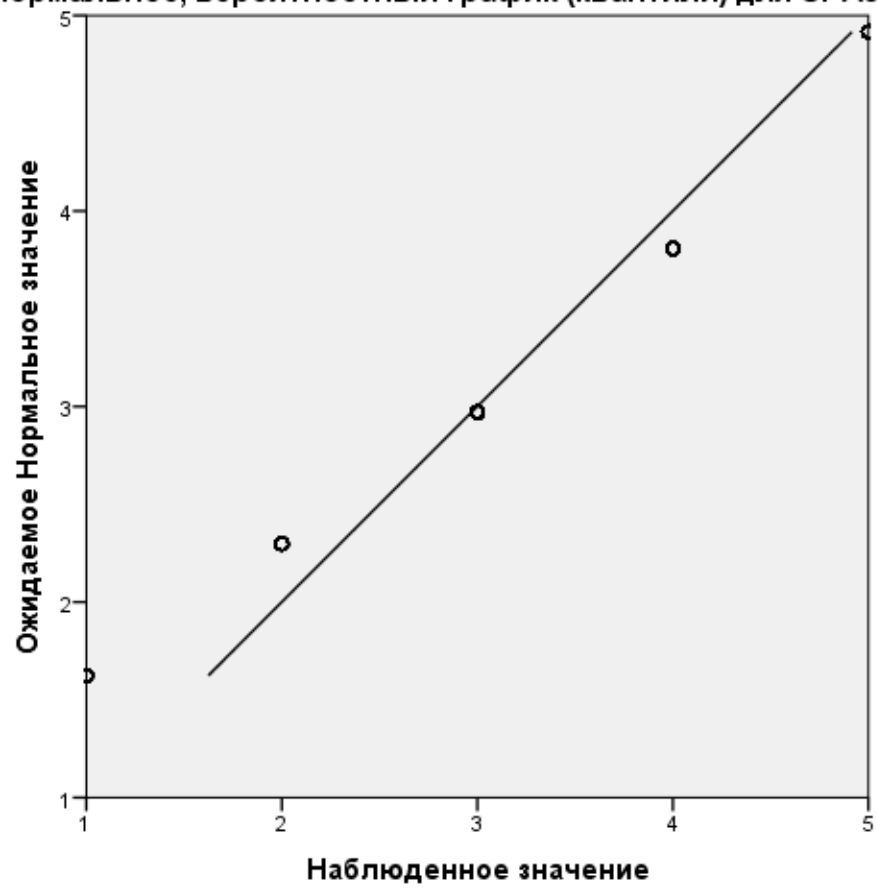

Нормальное, вероятностный график остатков (квантили) с удаленным трендом для SPA6

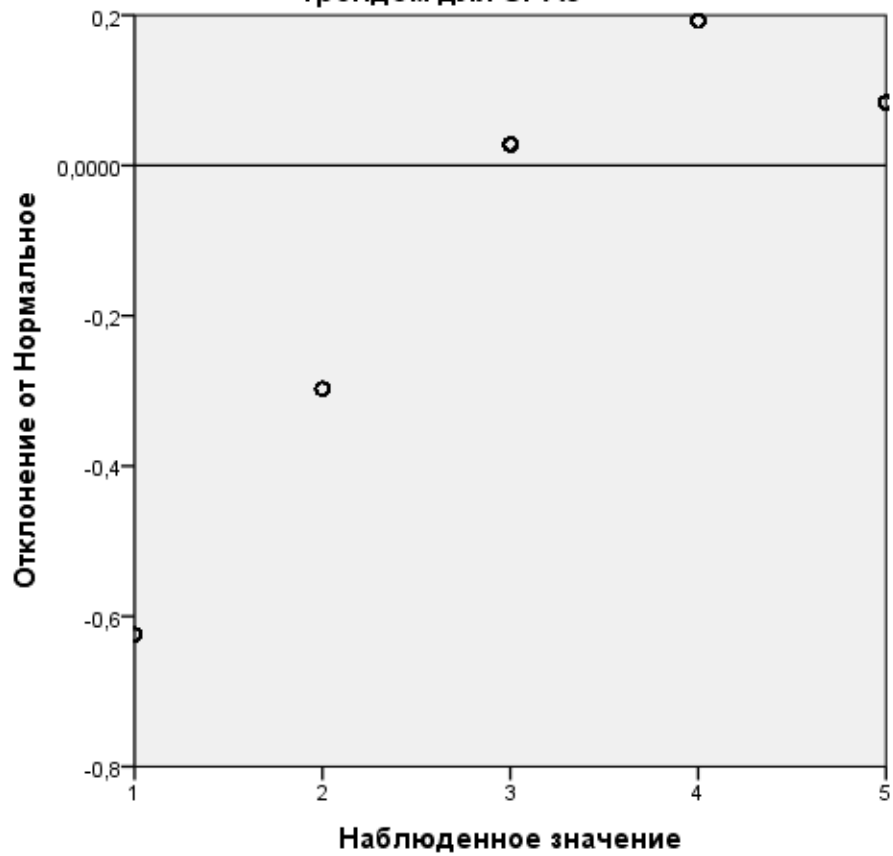

SPA

Нормальное, вероятностный график (квантили) для SPA

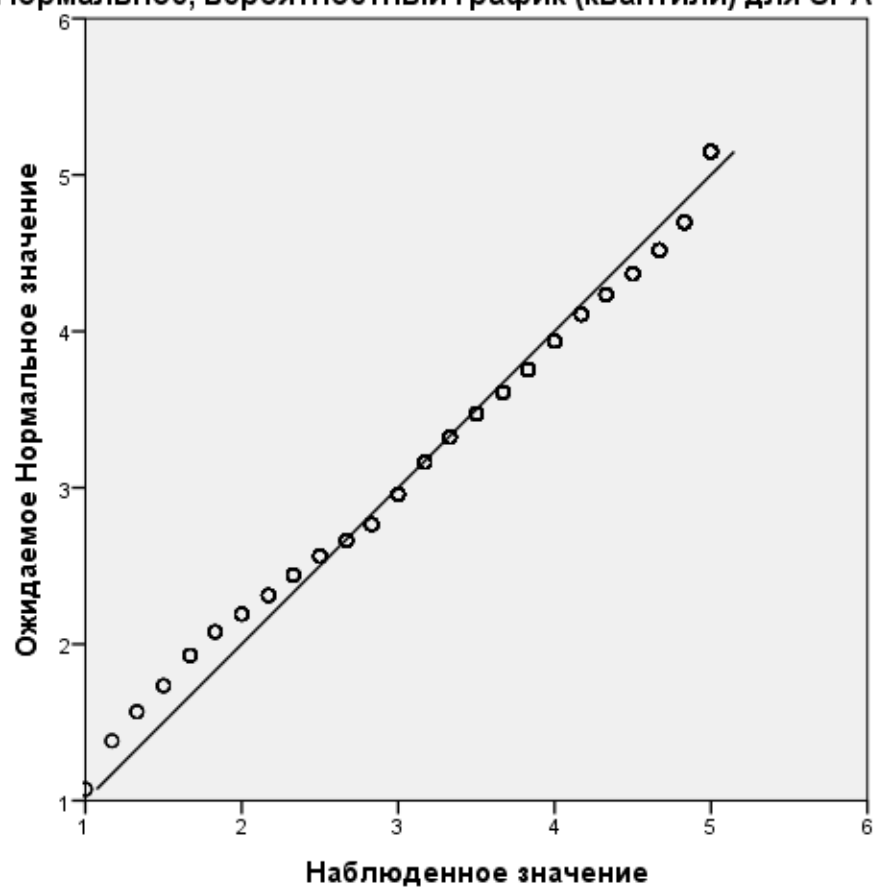

Нормальное, вероятностный график остатков (квантили) с удаленным трендом для SPA

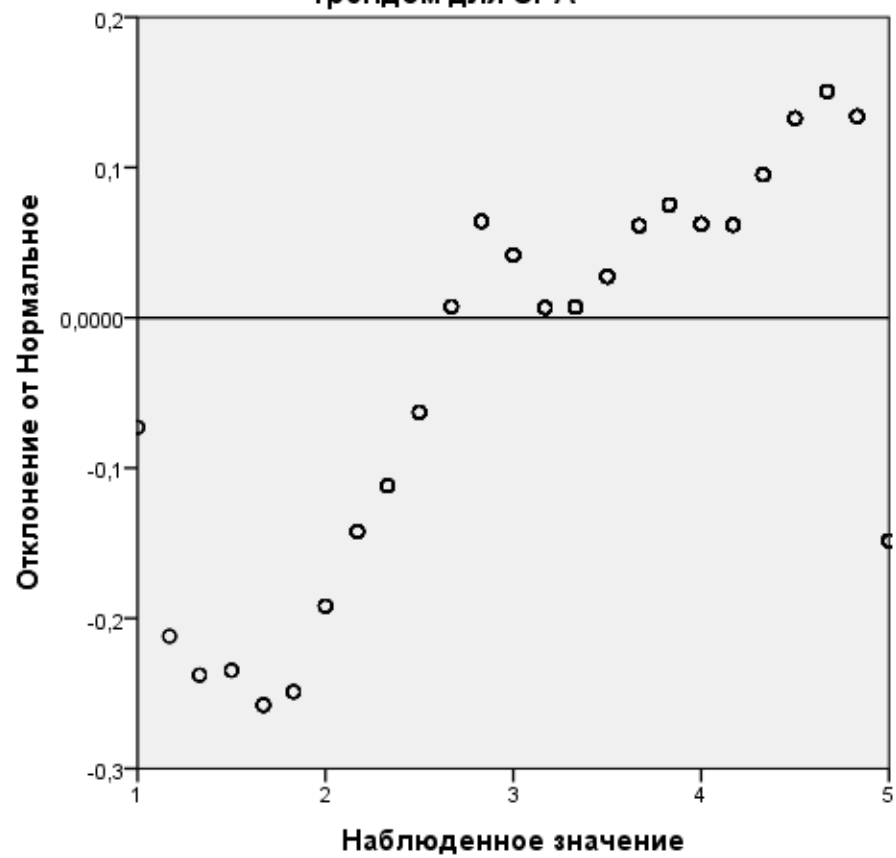

CPA1

Нормальное, вероятностный график (квантили) для СРА1

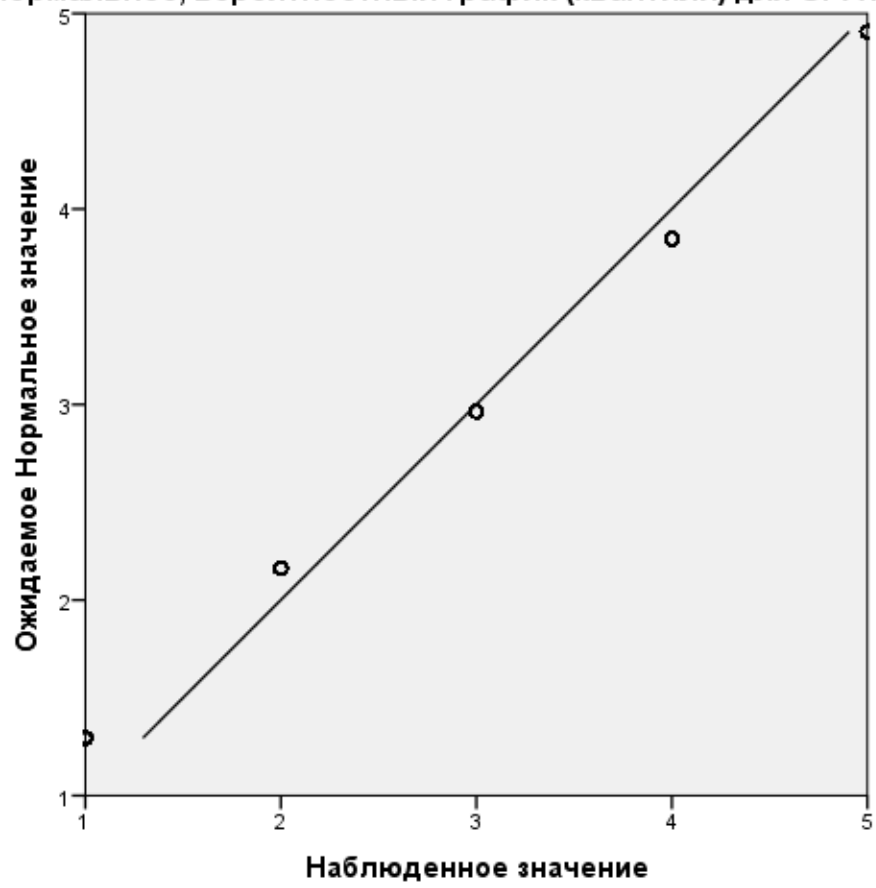



Нормальное, вероятностный график остатков (квантили) с удаленным трендом для CPA1

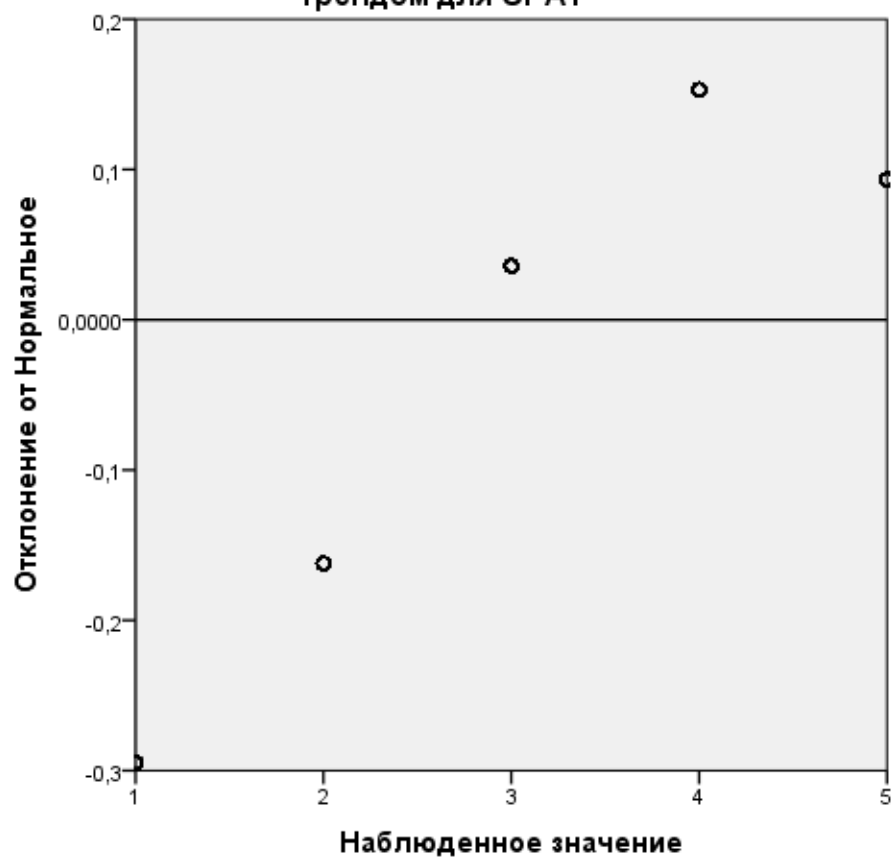

CPA2

Нормальное, вероятностный график (квантили) для СРА2

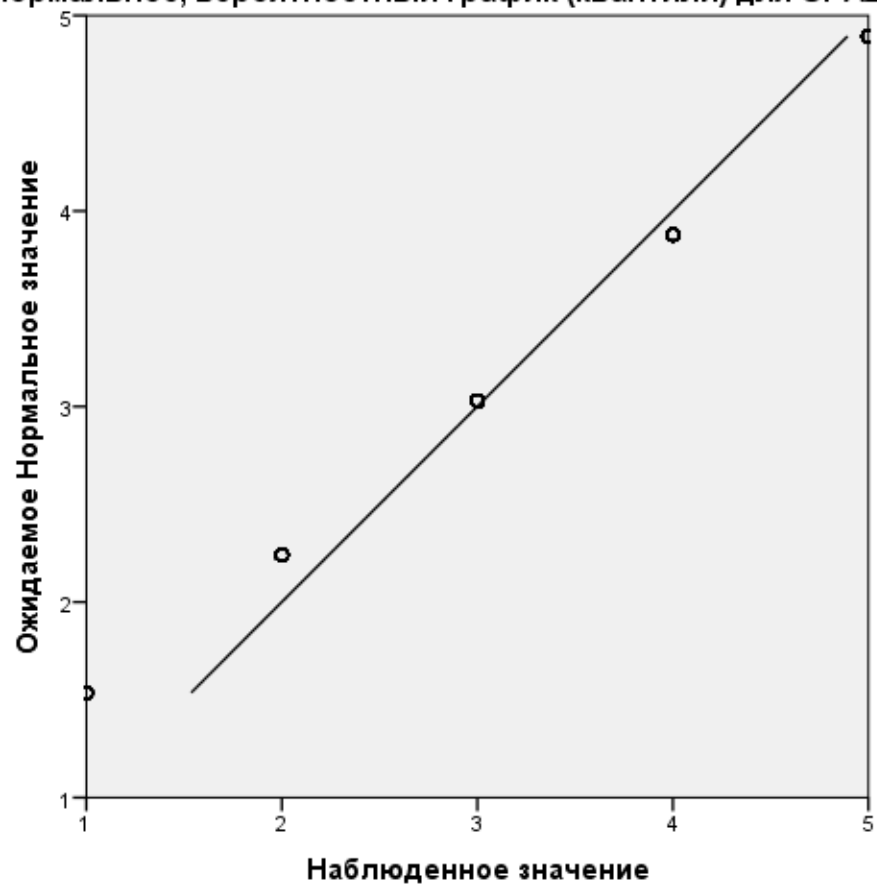

Нормальное, вероятностный график остатков (квантили) с удаленным трендом для CPA2

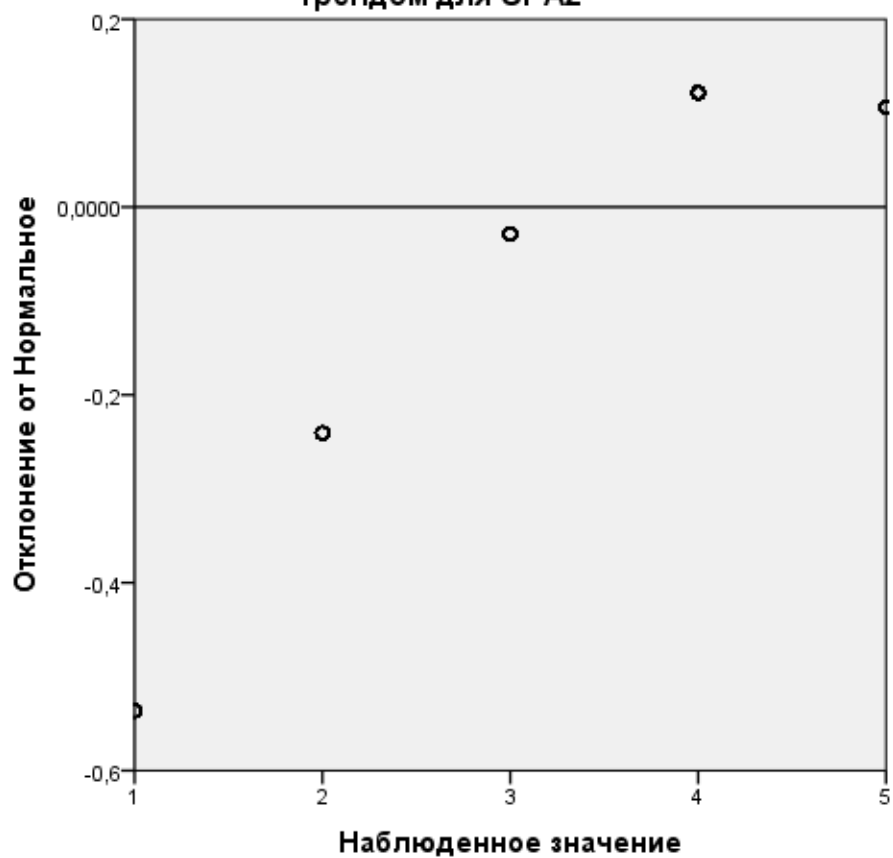

CPA3

Нормальное, вероятностный график (квантили) для СРАЗ

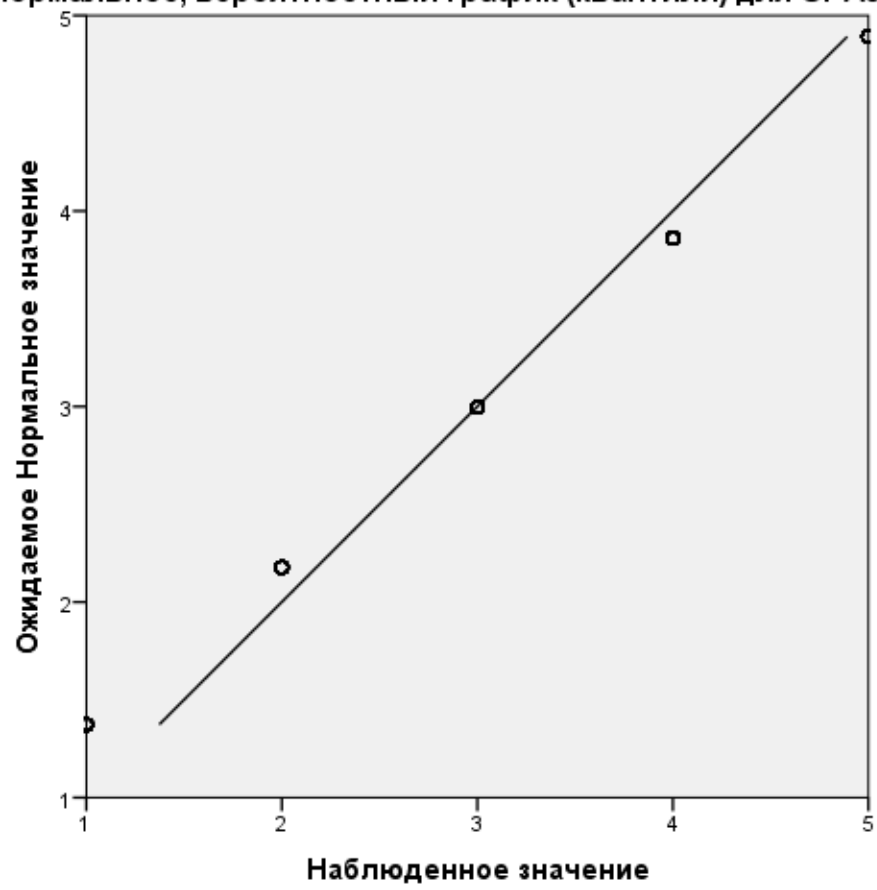

Нормальное, вероятностный график остатков (квантили) с удаленным трендом для СРАЗ

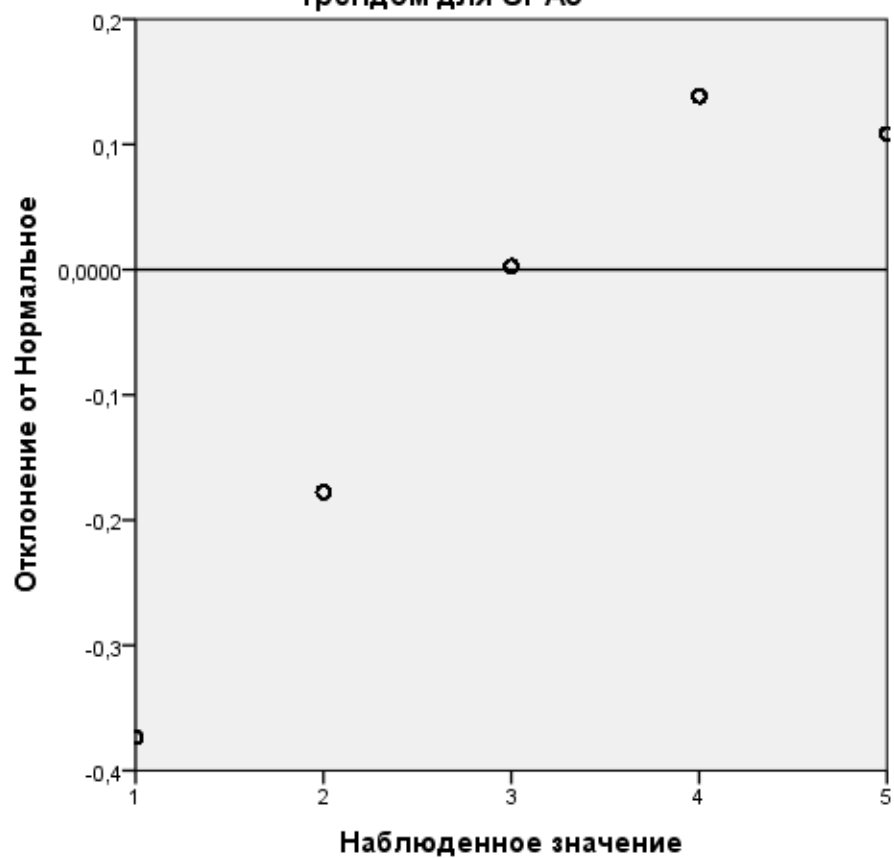

СРА4

Нормальное, вероятностный график (квантили) для СРА4

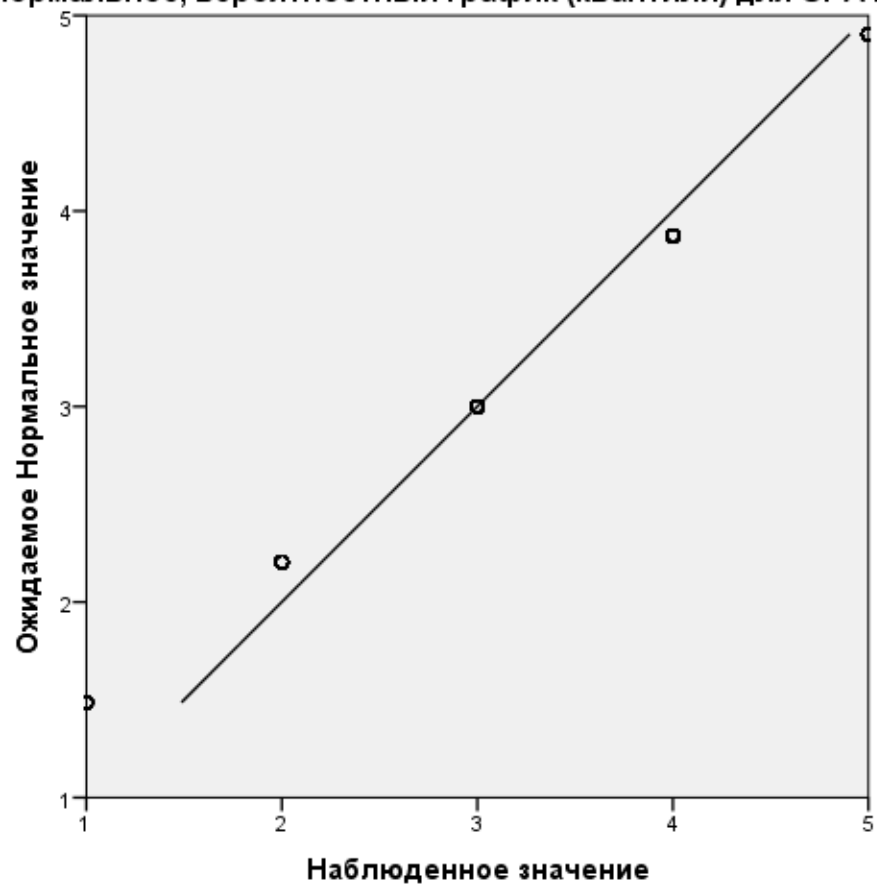

Нормальное, вероятностный график остатков (квантили) с удаленным трендом для CPA4

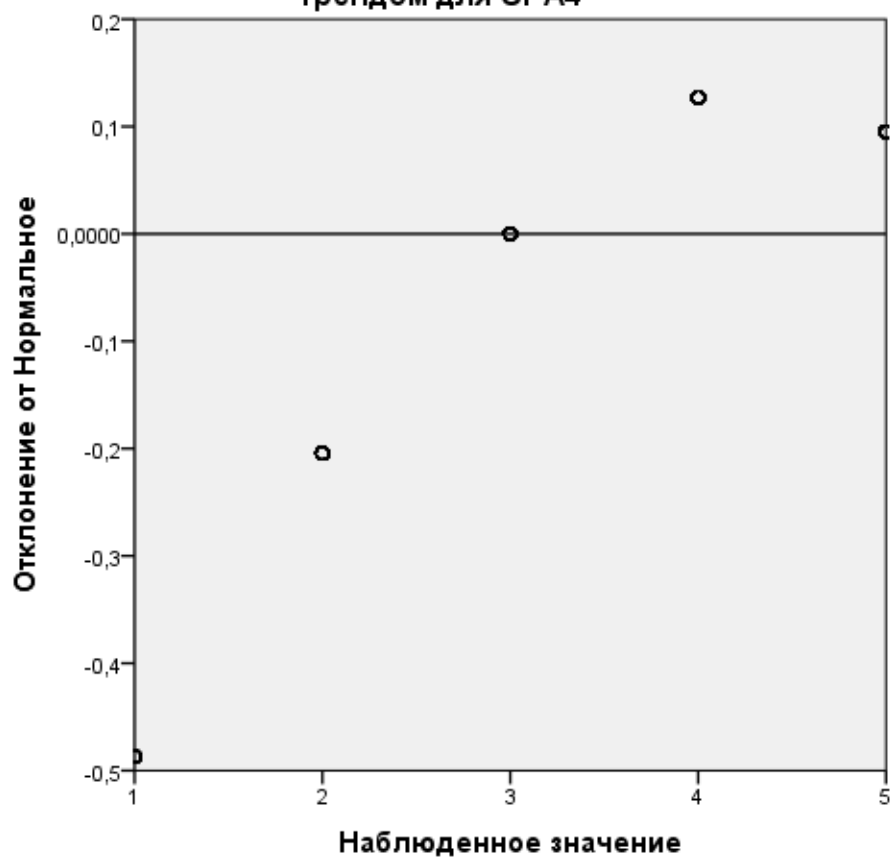

CPA5

Нормальное, вероятностный график (квантили) для СРА5

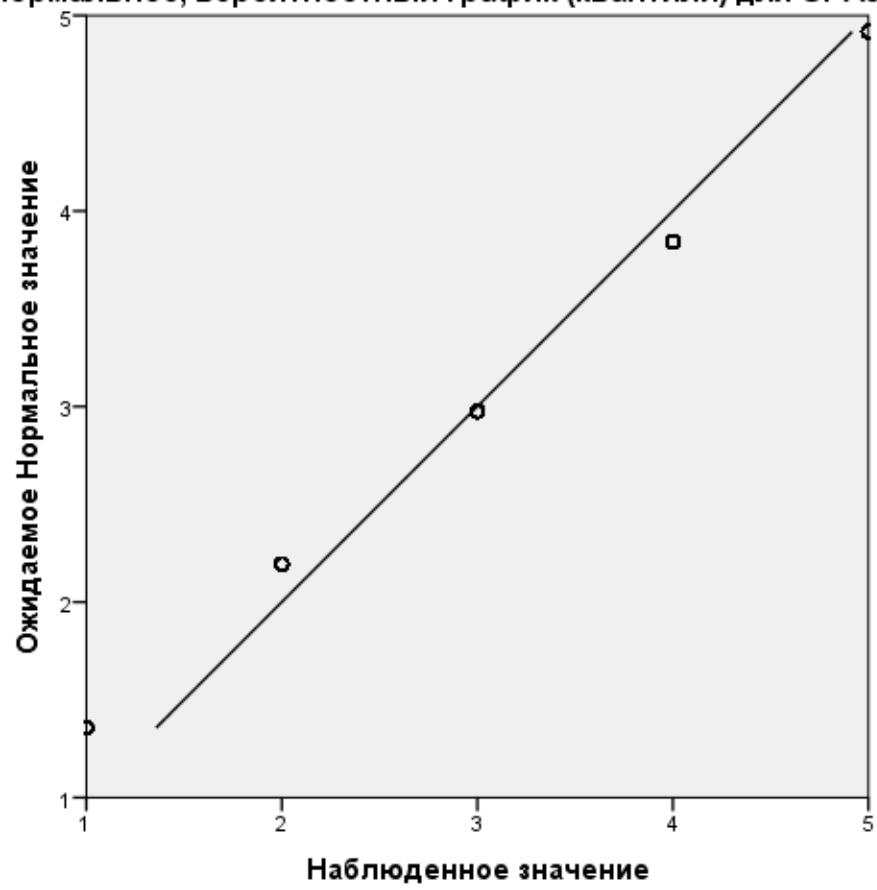



Нормальное, вероятностный график остатков (квантили) с удаленным трендом для CPA5

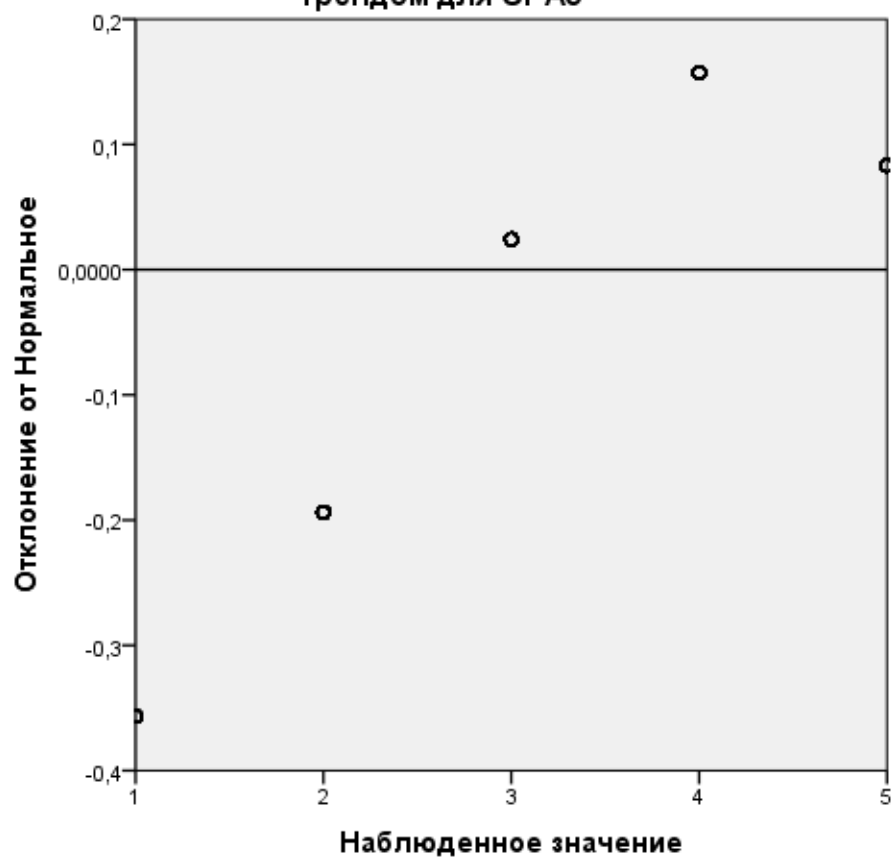

CPA6

Нормальное, вероятностный график (квантили) для СРА6

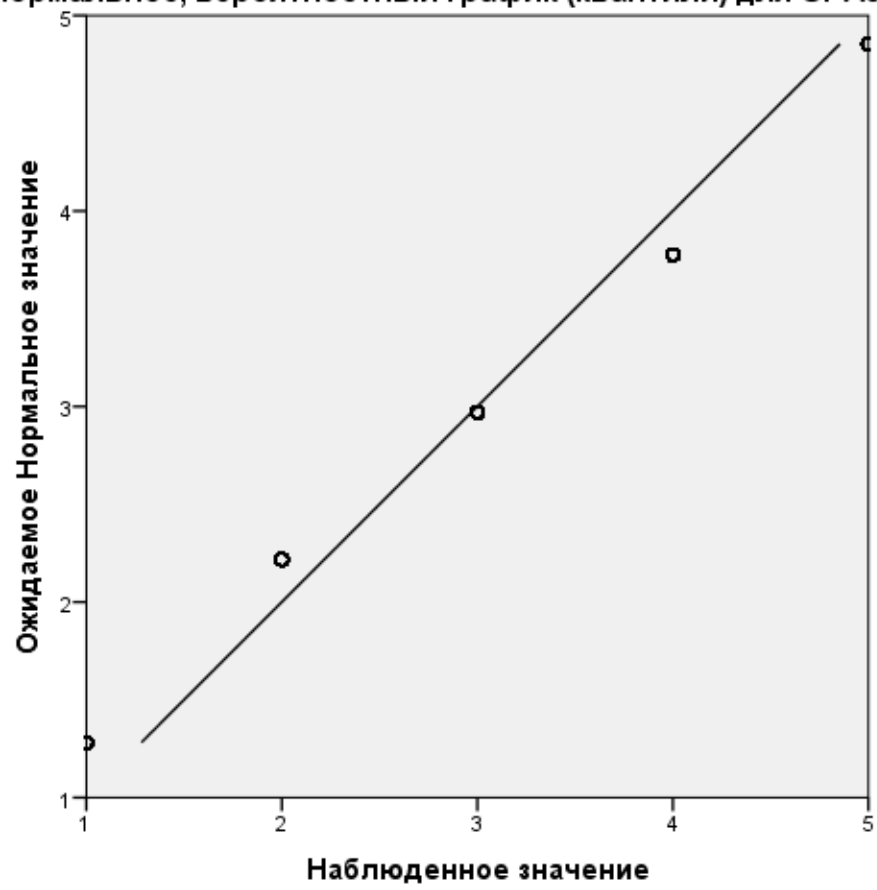

Нормальное, вероятностный график остатков (квантили) с удаленным трендом для СРА6

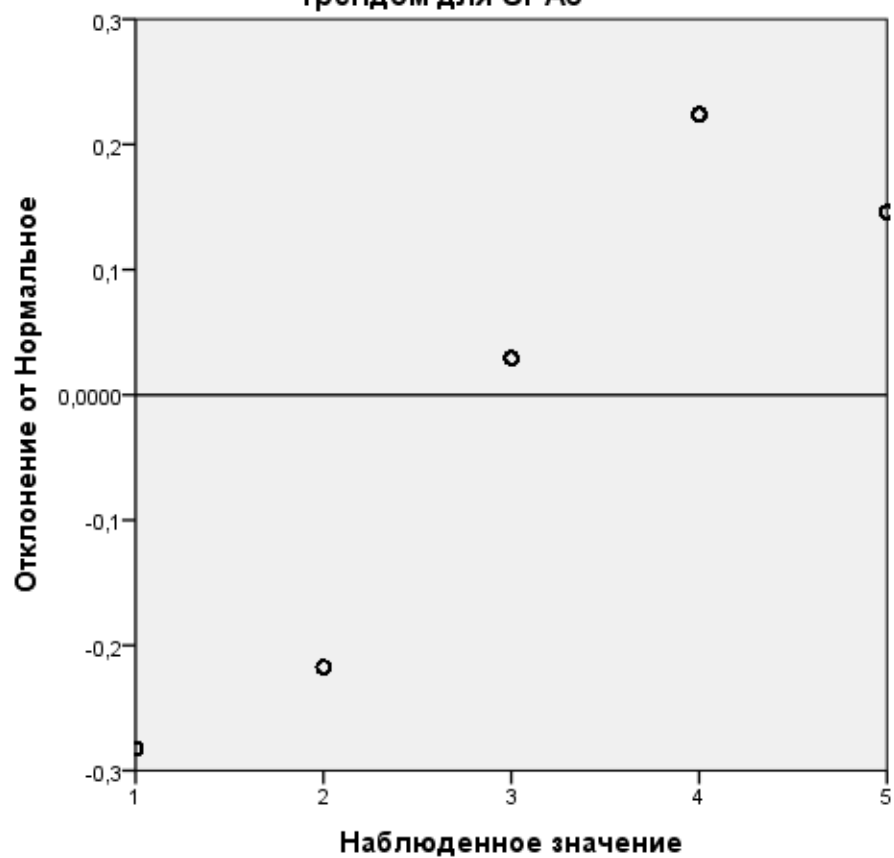

СРА

Нормальное, вероятностный график (квантили) для СРА

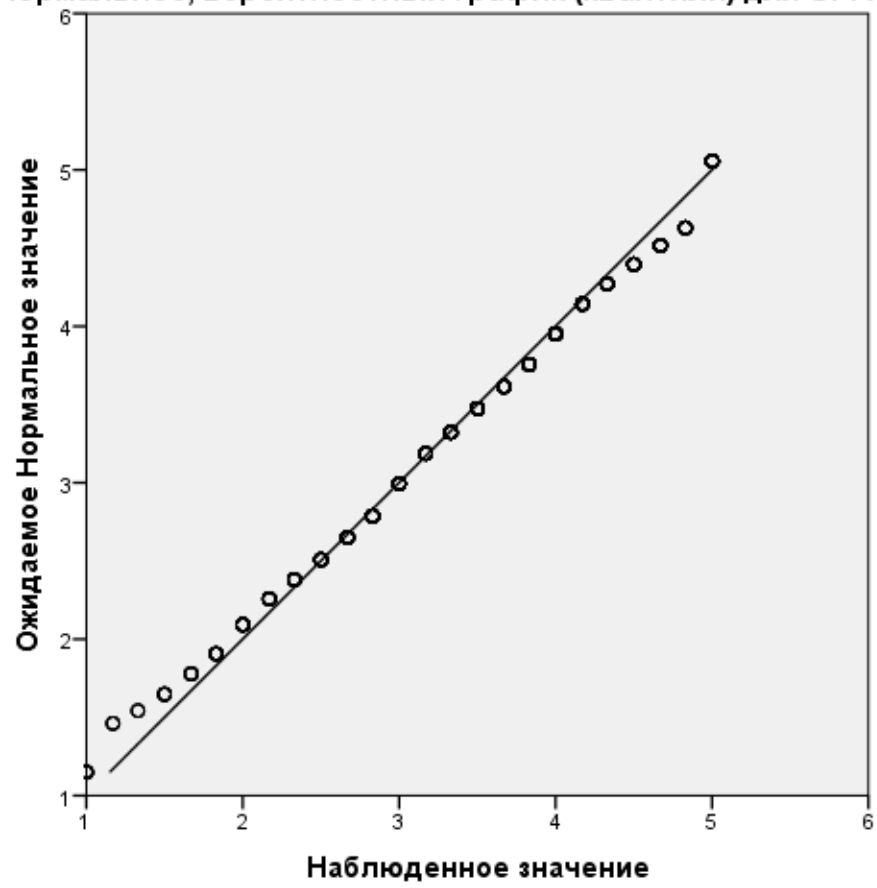

Нормальное, вероятностный график остатков (квантили) с удаленным трендом для СРА

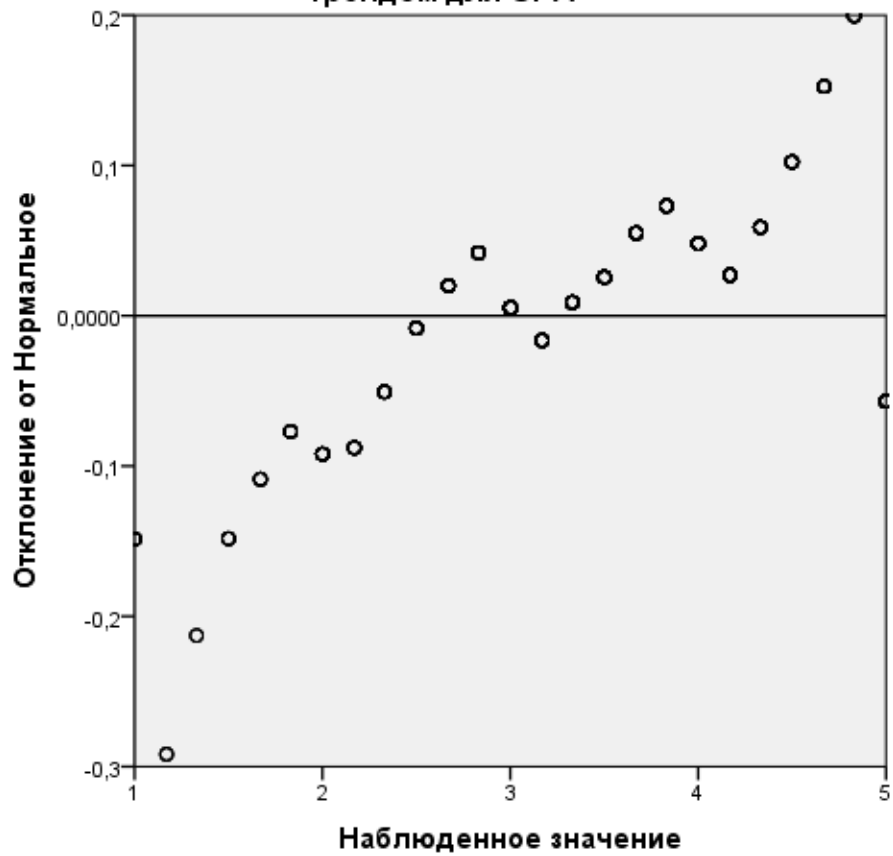

Col

Нормальное, вероятностный график (квантили) для Col

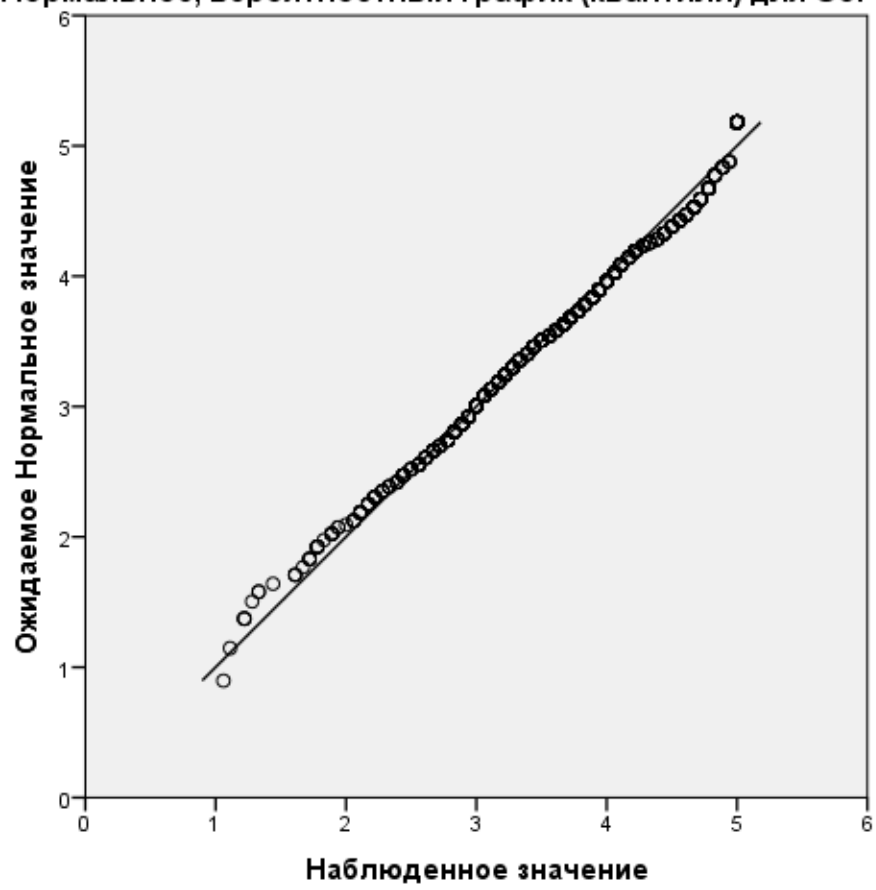

Нормальное, вероятностный график остатков (квантили) с удаленным трендом для Col

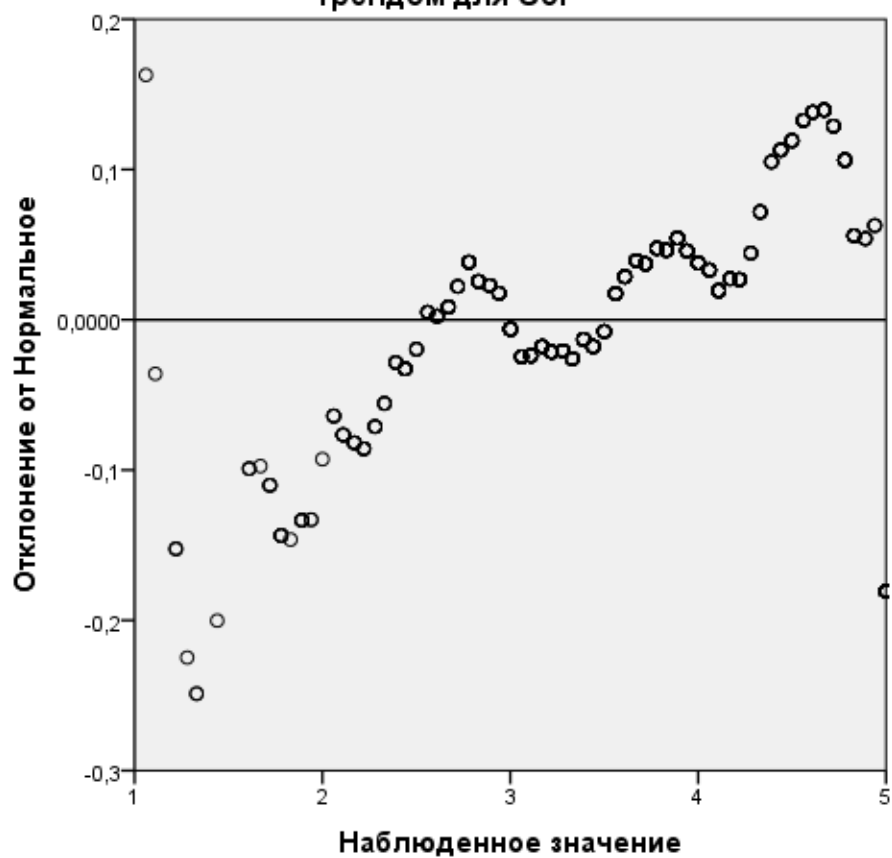

Supplement: s1 [file s1]
